# Supplementary material for: Guidelines: is bigger better? A review of SIGN guidelines
Source: PubMed Central journal article supplement — BMJ Open. 2014 Feb 5;4(2):e004278. doi: 10.1136/bmjopen-2013-004278 (PMC3918980; doi:10.1136/bmjopen-2013-004278), 2014-02-05
Supplement: bmjopen-2013-004278.draft_revisions.pdf [file bmjopen-2013-004278.draft_revisions.pdf]

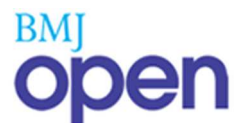

## National Guidelines – How evidence based are they?

|                                 |                                                                                                                                                                                                                                                            |
|---------------------------------|------------------------------------------------------------------------------------------------------------------------------------------------------------------------------------------------------------------------------------------------------------|
| Journal:                        | <i>BMJ Open</i>                                                                                                                                                                                                                                            |
| Manuscript ID:                  | bmjopen-2013-004278                                                                                                                                                                                                                                        |
| Article Type:                   | Research                                                                                                                                                                                                                                                   |
| Date Submitted by the Author:   | 17-Oct-2013                                                                                                                                                                                                                                                |
| Complete List of Authors:       | Baird, Alastair; The White House, Lawrence, James; Dumfries & Galloway Royal Infirmary, Research & Development Support Unit                                                                                                                                |
| <b>Primary Subject Heading</b>: | Evidence based practice                                                                                                                                                                                                                                    |
| Secondary Subject Heading:      | General practice / Family practice                                                                                                                                                                                                                         |
| Keywords:                       | HEALTH SERVICES ADMINISTRATION & MANAGEMENT, Protocols & guidelines < HEALTH SERVICES ADMINISTRATION & MANAGEMENT, Quality in health care < HEALTH SERVICES ADMINISTRATION & MANAGEMENT, Clinical governance < HEALTH SERVICES ADMINISTRATION & MANAGEMENT |
|                                 |                                                                                                                                                                                                                                                            |

SCHOLARONE™  
Manuscripts

1  
2  
3  
4  
5  
6  
7  
8  
9  
10  
11 **National Guidelines – How evidence based are they?**  
12  
13  
14  
15  
16  
17  
18  
19  
20  
21  
22  
23  
24

25 Dr A Gordon Baird, MB ChB MRCOG FRCGP R&D General  
26 Practice Adviser, Research and Development Support Unit,  
27 Dumfries and Galloway Royal infirmary, Bankend Road,  
28 Dumfries DG1 4AP.  
29  
30  
31

32  
33  
34  
35  
36 Dr James R Lawrence, BSc MD FRCP(Glas & Edin) R&D Clinical  
37 Lead, Research and Development Support Unit, Dumfries and  
38 Galloway Royal infirmary, Bankend Road, Dumfries DG1 4AP.  
39  
40  
41  
42  
43  
44  
45  
46  
47  
48  
49  
50  
51  
52  
53  
54  
55  
56  
57  
58  
59  
60

## **ABSTRACT**

### **Background**

National guidelines have become an integral part of UK general practice and aim to deliver quality and consistency within practices. As with any intervention, there are negative as well as positive consequences. Guideline effectiveness depends on the quality of evidence used.

### **Aim**

To quantify and analyse the quality of evidence that is presented in national guidelines.

### **Design and setting**

Levels of evidence used in all the current valid recommendations in the Scottish Intercollegiate Guideline Network (SIGN) guidelines were reviewed and statistically analysed.

### **Method**

The data was collected from published guidelines available online to the public. A professional group selected by a national organisation develops each of these guidelines. Statistical analysis of the relationship between the number of guideline recommendations and the quality of evidence used in its recommendations was performed.

### **Result**

A significant correlation between the number of recommendations in a guideline and the use of level D evidence was discovered.

### **Conclusion**

Practice guidelines should be brief and based on scientific evidence. Paradoxically the longest guidelines have the highest proportion of recommendations based on the lowest level of evidence. Guideline developers should be more aware of the need for brevity and a stricter application of evidence-based principles could achieve this. The findings support calls for a review of how evidence is used and presented in guidelines.

Dr A Gordon Baird affirms that this manuscript is an honest, accurate, and transparent account of the study being reported; that no important aspects of the study have been omitted; any discrepancies from the study as planned have been explained.

The data is in the public domain; there were no ethical conflicts; there was no funding.

## **Article Summary**

### **Article focus**

Examines the hypothesis that larger guidelines rely disproportionately on poor evidence.

### **Key Messages**

- One third of current national guidelines is supported only by case reports, case studies and expert opinion.
- Guidelines with large numbers of recommendations are more likely to use weak evidence.
- Guideline development groups appear to vary in their approach to offering recommendations.
- Guideline recommendations should be based on good evidence.
- Without good science scientific evidence, avoiding a recommendation or highlighting the need for research should be considered.

### **Strengths and limitations of the study**

#### **Strengths.**

- This is the first objective evidence of inconsistencies in approach by national guideline developers
- This supports commentator suggestion that even without good evidence a group will prefer consensus.
- Adds to the current debate about how guidelines might be developed in the future

#### **Limitations.**

- The study is limited to only one set of national guidelines.
- Reasons for the differences in quality of evidence preferred by the guideline development groups is unclear

## **SIGN Guidelines – How evidence based are they?**

### INTRODUCTION

The Scottish Intercollegiate Guidelines Network (SIGN) was founded in 1993. It is a national body, professionally led and publicly funded. SIGN's founding principles proposed direct links between evidence and recommendations, offering a brief and succinct quick-reference guide for clinicians<sup>1</sup>. Guidelines anticipated presenting brief, evidence based clinical advice. They have developed into long and authoritative texts that are used by managers and politicians to inform policy. SIGN has no responsibility to consider cost-effectiveness and no direct input into the Quality Outcomes Framework (QOF). A formal arrangement between SIGN and the National Institute of Clinical Excellence (NICE) has existed from 2003.

The World Health Organisation (WHO) recognises that current recommendation categories may be ambiguous<sup>2</sup> and has encouraged guideline developers to use a different form of grading, including a category "Use only in the context of research" where doubt exists.

Guideline developers have conflict of interest policies reported as challenging to apply. Where doubt exists, groups of specialists may feel consensus more defensible than acknowledging uncertainty.<sup>3</sup>

Even with the best evidence, concerns are expressed about the relevance of guidelines in treating patients with multiple morbidities<sup>4</sup>, and the emergence of the phenomenon of reversal<sup>5,6</sup>, where established practice, sometimes evidence based, is shown to be sub-optimal or harmful. This study looks at the quality of evidence used for SIGN guidelines, and describes a significant trend for some groups to emphasise poorly evidence-backed recommendations.

## METHODS

SIGN guidelines were accessed online. Guidelines that were “Current” and “Current 3-7 years. Some recommendations may be out of date.” in September 2013 were included. Those that had been “Withdrawn”, “Recommendations being updated”, “Need for update being considered” and those with no recommendations were excluded. Key recommendations and implementation recommendations were excluded.

SIGN guideline 50 describes an established process for developing guidelines.<sup>7</sup> This process is independent of this study, but is stated to be an objective process. SIGN guidelines have four grades of recommendation outlined in table 1. Table 2 describes the level of evidence supporting the recommendation grading.

The level of evidence used by each guideline was independently recorded by 3 investigators and errors resolved. A statistical analysis of the correlation between the proportion of level D evidence and the total number of recommendations was performed for the 42 guidelines.

## RESULTS

The 42 guidelines consisted of 2559 pages, ranging from 26 to 161 (median 59.5) pages. The longest guideline, number 116 was 61 pages longer than the next largest. The number of recommendations per page ranged from 0.2 to 1.8 (median 0.7). The number of recommendations per guideline is presented in table 3.

Of the 1999 recommendations, 480 (24.0%) were level A, 491(24.6 %) were level B, 318 (15.9%) level C, and 710 (35.5%) level D. Thus 40.2% were poorly evidenced (C&D) and over a third (D) developed almost entirely on “expert opinion”. The number of level A recommendations per guideline ranged from 0-57 (median 9), level B from 2-62 (median 8.5) level C ranged from 0-26 (median 6) and D from 0-60 (median 14.5). 4 guidelines had no level A evidence.

1  
2  
3  
4  
5 The proportion of level D evidence increases with the number of recommendations  
6 made. This correlation is significant with Kendall's Tau=0.22 [approximate 95%  
7 confidence interval 0.008-0.45] p value =0.04, and Spearman rho=0.22 [approximate  
8 95% CI 0.02-0.57] p value= .04.  
9  
10

## 11 12 13 DISCUSSION

14 This study reveals that expert groups who produce long guidelines rely on poor  
15 evidence more heavily than others. National guidelines are useful and important and  
16 there is a debate about how evidence is best presented. Guidelines define standards  
17 of care, help busy clinicians and allow managers and politicians to develop  
18 governance. An American study (using 3 not 4 levels of evidence) similarly found that  
19 48% were "based on expert opinion, case studies, or standards of care."<sup>8</sup> Where  
20 patients are involved in clinical decisions, honestly declaring uncertainty has merit.  
21 In the absence of good scientific evidence, recommending a course of action without  
22 understanding the circumstances of the individual to whom it is applied seems both  
23 risky and, assuming patient choice, imbalanced.  
24  
25  
26  
27  
28  
29  
30  
31  
32  
33

34 This study did not examine why longer guidelines use poorer evidence. It has been  
35 postulated that there is security in "just doing what everyone else is doing – even if  
36 what everyone else is doing isn't very good."<sup>3</sup> Cloistered groups of experts may view  
37 their own opinion as more authoritative than science can support. Reliance on  
38 expert opinion has a poor track record. Blinded by certainty, expert groups defining  
39 established practice have perpetuated radical mastectomy instead of conservative  
40 surgery, Class 1C antiarrhythmics<sup>9</sup>, pulmonary artery catheters in heart failure<sup>10</sup>,  
41 electronic foetal monitoring in low risk pregnancies: even then practice can take a  
42 decade to reverse<sup>11</sup>.  
43  
44  
45  
46  
47  
48  
49  
50  
51

52 Even good evidence is subject to the phenomenon of reversal where new evidence  
53 contradicts current practice. Reversal can affect around 13-16% of publications<sup>5,6</sup>.  
54 This may partly explain why the implementation of even the most soundly evidence  
55 based national guidelines fails to improve outcome<sup>12,13,14</sup>. There is potential  
56  
57  
58  
59  
60

1  
2  
3 harm<sup>15,16</sup> from guidelines in real clinical settings, for example increasing radiation  
4 dose without benefit<sup>17</sup> or increased risks of anticoagulation<sup>18</sup>.  
5  
6  
7

8  
9 SIGN 116 (diabetes), is a notable exception. It is more than 50% larger than the next  
10 largest, 2.5 times longer than the average and yet uses the 4<sup>th</sup> lowest level D  
11 recommendations. There are a number of hypotheses why this group reports  
12 differently. The advisory committee to SIGN's English equivalent (NICE) informs  
13 Quality Outcomes Framework (QOF) policy. Diabetes is the largest clinical UK QOF  
14 indicator and is associated with substantial payment incentives. The need for  
15 objective evaluation of performance drives a use of surrogate outcomes without  
16 appropriate clinical endpoints.<sup>19</sup> Diabetes guidelines have suffered several  
17 noteworthy reversals. Examples include the recommendation of glycosylated  
18 haemoglobin reduction resulting in increased use of rosiglitazone (still mentioned in  
19 the current document) both associated with harm<sup>20</sup>, including mortality.<sup>21</sup> Aspirin  
20 recommendations have also been changed from previous guidelines. Is it possible  
21 that the repeated use of surrogate outcomes arises from group dynamics driven by a  
22 powerful external agenda?  
23  
24  
25  
26  
27  
28  
29  
30  
31  
32  
33

34  
35 Many doctors whose expertise cross several guidelines<sup>22,23</sup>, express concerns about  
36 guideline development groups. The inappropriate exclusion of disease groups from  
37 general population data is common. Smoking cessation advice for testicular cancer  
38 survivors is level C, although studies in the general population (without excepting  
39 specific disease groups) advises everyone to stop smoking. Overall smoking cessation  
40 was level D and C once each and B on three occasions. Using evidence in this way  
41 may imply group dysfunction. Differently constituted groups, or greater oversight  
42 might avoid problems.  
43  
44  
45  
46  
47  
48  
49

50  
51 In 1993, SIGN guidelines stated intention was to be evidence based, brief and  
52 succinct. Brevity increases value as a quick reference guide. Removing or reducing  
53 poorly evidenced recommendations would reduce size by more than a third overall  
54 and in some up to two thirds. 2559 pages is longer than the Oxford Textbook of  
55 Primary Medical Care. Evidence based medicine is described as "the use of  
56  
57  
58  
59  
60



1  
2  
3 mathematical estimates of the risk of benefit and harm, derived from high-quality  
4 research on population samples, to inform clinical decision-making in the diagnosis,  
5 investigation or management of individual patients"<sup>24</sup>. Guidelines relevance to daily  
6 practice, the reliability of evidence and whether the application of evidence will  
7 improve outcomes are important questions.  
8  
9  
10

11  
12  
13 These results may reflect how professional groups deal with uncertainty. If so, this is  
14 not good for individual patients faced with the same uncertainties (whether aware  
15 of it or not), nor is it good for scientists who actively seek unanswered questions by  
16 challenging established practice, an area in which medicine has a poor record from  
17 Semmelweis to the present day.  
18  
19  
20  
21

22  
23  
24 The finding of a significant increase of level D recommendations in larger guidelines  
25 has not happened by chance. A wider debate about how guideline groups can create  
26 greater clarity about the reliability of evidence used is needed.<sup>25</sup> Reducing the use of  
27 poorly evidenced recommendations has potential to create a shorter, more reliable  
28 and usable clinical support.  
29  
30  
31  
32

33  
34  
35  
36  
37 Acknowledgements.

38  
39 Heather Barrington, Statistical Adviser; Bridget Bird, Administrative Assistant;  
40 Research and Development Support Unit, Dumfries and Galloway Royal infirmary,  
41 Bankend Road, Dumfries DG1 4AP.  
42  
43  
44  
45

46 Conflict of interest; none  
47  
48  
49  
50  
51  
52  
53  
54

55 Table 1  
56  
57  
58  
59  
60

## GRADES OF RECOMMENDATION

|          |                                                                                                                                                                                                                                                                                              |
|----------|----------------------------------------------------------------------------------------------------------------------------------------------------------------------------------------------------------------------------------------------------------------------------------------------|
| <b>A</b> | At least one meta-analysis, systematic review, or RCT rated as 1++, and directly applicable to the target population; or<br>A body of evidence consisting principally of studies rated as 1+, directly applicable to the target population, and demonstrating overall consistency of results |
| <b>B</b> | A body of evidence including studies rated as 2++, directly applicable to the target population and demonstrating overall consistency of results; or<br>Extrapolated evidence from studies rated as 1++ or 1+                                                                                |
| <b>C</b> | A body of evidence including studies rated as 2+, directly applicable to the target population and demonstrating overall consistency of results; or<br>Extrapolated evidence from studies rated as 2++                                                                                       |
| <b>D</b> | Evidence level 3 or 4; or<br>Extrapolated evidence from studies rated as 2+                                                                                                                                                                                                                  |

Table 2

|            |                                                                                                                                                |
|------------|------------------------------------------------------------------------------------------------------------------------------------------------|
| <b>1++</b> | High quality meta-analyses, systematic reviews of RCTs, or RCTs with a very low risk of bias                                                   |
| <b>1+</b>  | Well conducted meta-analyses, systematic reviews, or RCTs with a low risk of bias                                                              |
| <b>1 -</b> | -Meta-analyses, systematic reviews, or RCTs with a high risk of bias                                                                           |
| <b>2++</b> | High quality systematic reviews of case control or cohort studies                                                                              |
| <b>2+</b>  | High quality case control or cohort studies with a very low risk of confounding or bias and a high probability that the relationship is causal |
| <b>2 -</b> | Case control or cohort studies with a high risk of confounding or bias and a significant risk that the relationship is not causal              |
| <b>3</b>   | Non-analytic studies, eg case reports, case series                                                                                             |
| <b>4</b>   | Expert opinion                                                                                                                                 |

Table 3

Main Recommendations

| Number | Name                                                                                                                   | Pages        | A           | B          | C          | D          | Total      | %age D      |
|--------|------------------------------------------------------------------------------------------------------------------------|--------------|-------------|------------|------------|------------|------------|-------------|
| 133    | Management of hepatitis C                                                                                              | 57           | 20          | 24         | 7          | 52         | <b>103</b> | 50.5%       |
| 132    | Long-term follow-up of survivors of childhood cancer                                                                   | 62           | 0           | 7          | 9          | 14         | <b>30</b>  | 46.7%       |
| 131    | Management of schizophrenia                                                                                            | 64           | 10          | 19         | 3          | 15         | <b>47</b>  | 31.9%       |
| 130    | Brain injury rehabilitation in adults                                                                                  | 68           | 0           | 14         | 7          | 8          | <b>29</b>  | 27.6%       |
| 129    | Antithrombotics: indication and management                                                                             | 68           | 25          | 11         | 6          | 19         | <b>61</b>  | 31.1%       |
| 127    | Management of perinatal mood disorders                                                                                 | 47           | 0           | 5          | 6          | 15         | <b>26</b>  | 57.7%       |
| 126    | Diagnosis and management of colorectal cancer                                                                          | 56           | 11          | 19         | 15         | 29         | <b>74</b>  | 39.2%       |
| 125    | Management of atopic eczema in primary care                                                                            | 34           | 3           | 5          | 3          | 2          | <b>13</b>  | 15.4%       |
| 124    | Management of adult testicular germ cell tumours                                                                       | 63           | 6           | 6          | 9          | 21         | <b>42</b>  | 50.0%       |
| 123    | Management of early rheumatoid arthritis                                                                               | 27           | 3           | 7          | 2          | 0          | <b>12</b>  | 0.0%        |
| 122    | Prevention and management of venous thromboembolism                                                                    | 88           | 26          | 15         | 14         | 55         | <b>110</b> | 50.0%       |
| 121    | Diagnosis and management of psoriasis and psoriatic arthritis in adults                                                | 65           | 11          | 16         | 6          | 26         | <b>59</b>  | 44.1%       |
| 120    | Management of chronic venous leg ulcers                                                                                | 46           | 5           | 3          | 4          | 7          | <b>19</b>  | 36.8%       |
| 119    | Management of patients with stroke: identification and management of dysphagia                                         | 42           | 0           | 6          | 4          | 20         | <b>30</b>  | 66.7%       |
| 118    | Management of patients with stroke: rehabilitation, prevention and management of complications, and discharge planning | 101          | 21          | 29         | 7          | 21         | <b>78</b>  | 26.9%       |
| 117    | Management of sore throat and indications for tonsillectomy                                                            | 37           | 9           | 3          | 4          | 4          | <b>20</b>  | 20.0%       |
| 116    | Management of diabetes                                                                                                 | 161          | 57          | 62         | 23         | 16         | <b>158</b> | 10.1%       |
| 115    | Management of Obesity                                                                                                  | 87           | 6           | 11         | 7          | 11         | <b>35</b>  | 31.4%       |
| 114    | Nonpharmaceutical management of depression                                                                             | 37           | 5           | 4          | 0          | 0          | <b>9</b>   | 0.0%        |
| 113    | Diagnosis and pharmacological management of Parkinson's disease                                                        | 61           | 12          | 6          | 6          | 4          | <b>28</b>  | 14.3%       |
| 112    | Management of attention deficit and hyperkinetic disorders in children and young people                                | 45           | 6           | 4          | 3          | 4          | <b>17</b>  | 23.5%       |
| 111    | Management of hip fracture in old people                                                                               | 49           | 10          | 9          | 8          | 14         | <b>41</b>  | 34.1%       |
| 110    | Early management of patients with a head injury                                                                        | 76           | 1           | 7          | 6          | 17         | <b>31</b>  | 54.8%       |
| 109    | Management of genital Chlamydia trachomatis infection                                                                  | 40           | 3           | 6          | 9          | 29         | <b>47</b>  | 61.7%       |
| 108    | Management of patients with stroke or TIA: assessment, investigation, immediate management and secondary prevention    | 100          | 42          | 27         | 18         | 14         | <b>101</b> | 13.9%       |
| 107    | Diagnosis and management of headache in adults                                                                         | 81           | 17          | 16         | 9          | 34         | <b>76</b>  | 44.7%       |
| 106    | Control of pain in adults with cancer                                                                                  | 71           | 5           | 7          | 3          | 19         | <b>34</b>  | 55.9%       |
| 105    | Management of acute upper and lower gastrointestinal bleeding                                                          | 57           | 14          | 5          | 2          | 15         | <b>36</b>  | 41.7%       |
| 103    | Diagnosis and management of chronic kidney disease                                                                     | 50           | 9           | 6          | 4          | 3          | <b>22</b>  | 13.6%       |
| 102    | Management of invasive meningococcal disease in children and young people                                              | 46           | 1           | 4          | 6          | 26         | <b>37</b>  | 70.3%       |
| 99     | Management of cervical cancer                                                                                          | 73           | 1           | 13         | 19         | 29         | <b>62</b>  | 46.8%       |
| 97     | Risk estimation and the prevention of cardiovascular disease                                                           | 72           | 16          | 12         | 2          | 4          | <b>34</b>  | 11.8%       |
| 96     | Management of stable angina                                                                                            | 59           | 13          | 10         | 3          | 11         | <b>37</b>  | 29.7%       |
| 95     | Management of chronic heart failure                                                                                    | 55           | 9           | 12         | 1          | 1          | <b>23</b>  | 4.3%        |
| 94     | Cardiac arrhythmias and coronary heart disease                                                                         | 42           | 22          | 11         | 13         | 23         | <b>69</b>  | 33.3%       |
| 93     | Acute coronary syndromes                                                                                               | 60           | 11          | 14         | 9          | 8          | <b>42</b>  | 19.0%       |
| 91     | Bronchiolitis in children                                                                                              | 42           | 4           | 3          | 6          | 14         | <b>27</b>  | 51.9%       |
| 90     | Diagnosis and management of head and neck cancer                                                                       | 92           | 42          | 8          | 26         | 60         | <b>136</b> | 44.1%       |
| 89     | Diagnosis and management of peripheral arterial disease                                                                | 37           | 11          | 2          | 0          | 4          | <b>17</b>  | 23.5%       |
| 88     | Management of suspected bacterial urinary tract infection in adults                                                    | 45           | 8           | 10         | 2          | 10         | <b>30</b>  | 33.3%       |
| 87     | Management of oesophageal and gastric cancer                                                                           | 70           | 3           | 26         | 23         | 28         | <b>80</b>  | 35.0%       |
| 61     | Investigation of postmenopausal bleeding                                                                               | 26           | 2           | 7          | 4          | 4          | <b>17</b>  | 23.5%       |
|        |                                                                                                                        | <b>TOTAL</b> | <b>2559</b> | <b>480</b> | <b>491</b> | <b>318</b> | <b>710</b> | <b>1999</b> |

### **Contributorship Statement**

Both authors discussed the hypothesis that there was a disproportionate use of poor evidence in longer guidelines; both checked the raw data, and agreed on a statistical approach to discover whether the trend was significant or not. Both have been involved in writing and researching the evidence.

### **Funding.**

This research received no specific grant from any funding agency in the public, commercial or not-for-profit sectors.

### **Data Sharing.**

Technical appendix, statistical code, and dataset available from the corresponding author, who will provide a permanent, citable and open access home for the dataset.

### **Competing interests**

No competing interests

### **MeSH Headings**

- Practice Guideline N04.761.700.350.650
- General Practice H02.403.340
- Evidence-Based Medicine H02.249.750

### **How this fits in.**

Guidelines should encourage an evidence-based approach to clinical practice. Longer guidelines used significantly higher levels of poor evidence. WHO has proposed a different system of grading evidence. The effect of group behavior altering guideline development has been hypothesised. New research often challenges established clinical practice. Improving the quality of evidence, acknowledging uncertainty and shortening guideline length would make guidelines more clinically relevant and effective.

## REFERENCES

1 Harbour R, Lowe G, Twaddle S. Scottish Intercollegiate Guidelines Network; the  
2 first 15 years (1993-2008). J R Coll Physicians Edinb 2011 Jun;41(2) 163-168

3  
4  
5  
6  
7  
8  
9  
10  
11  
12  
13  
14  
15  
16  
17  
18  
19  
20  
21  
22  
23  
24  
25  
26  
27  
28  
29  
30  
31  
32  
33  
34  
35  
36  
37  
38  
39  
40  
41  
42  
43  
44  
45  
46  
47  
48  
49  
50  
51  
52  
53  
54  
55  
56  
57  
58  
59  
60

2 de Joncheere K, Hill S, Klazinga N, Mäkelä M, Oxman AD. The Clinical Guideline  
Programme of the National Institute for Health and Clinical Excellence (NICE) A  
review by the World Health Organization May 2006

3 Lenzer J. Why we can't trust clinical guidelines: BMJ 2013;346:f3830

4 Aylett V. Do geriatricians need guidelines? BMJ 2010 Sep;341 :c5340

5 Prasad V, Cifu, A, Ioannidis JP. Reversals of Established Medical Practices: Evidence  
to Abandon Ship. JAMA. 2012 Jan4;307(1):37-38,

6 Prasad V, Gall V, Cifu A. The frequency of medical reversal. Arch Int Med. 2011 Oct  
10;. 171(18): 1675-1676

7 <http://www.sign.ac.uk/pdf/sign50.pdf>

8 Tricoci P, Allen JM, Kramer JM, Califf RM, Smith Jr. SC. Scientific evidence  
underlying the ACC/AHA clinical practice guidelines. JAMA 2009 Feb25; 301 (8): 831-  
841

9 Echt DS, Liebson PR, Mitchell LB, Peters RW, Obias-Manno D, Barker AH, Arensberg  
D, Baker A, Friedman L, Greene HL, Huther ML, Richardson DW. Mortality and  
morbidity in patients receiving encainide, flecainide, or placebo - The Cardiac  
Arrhythmia Suppression Trial. New Eng J Med. 1991 Mar21; 324 (12): 781-788

10 Binanay C, Califf RM, Hasselblad V, O'Connor CM, Shah MR, Sopko G, Stevenson  
LW, Francis GS, Leier CV, Miller LW Evaluation study of congestive heart failure and  
pulmonary artery catheterization effectiveness: the ESCAPE trial. JAMA. 2005 Oct  
5;294(13):1625-33.

1  
2  
3  
4 11 Tatsioni A, Bonitsis NG, Ioannidis JA. Persistence of Contradicted Claims in the  
5 Literature. JAMA. 2007 Dec5 ;298(21):2517-2526.  
6

7  
8 12 Anderson JE, McKenzie C, Singh N, Gajree N, Giles L, Sharma P, McDonald A.  
9 Compliance with the 62 day target does not improve long-term survival. Association  
10 of Coloproctology of Great Britain and Ireland Annual Meeting 2012 Dublin Ireland.  
11

12 13 Kerr J, Smith R, Gray S, Beard D, Robertson CE. An audit of clinical practice in the  
14 management of head injured patients following the introduction of the Scottish  
15 Intercollegiate Guidelines Network (SIGN) recommendations. Emerg Med J.2005  
16 Dec; 22(12):850-854  
17

18  
19 14 Caplan LR. How well does "evidence-based" medicine help neurologists care for  
20 individual patients? Rev Neurol Dis.2007;4(2):75-84  
21

22  
23 15 Hutchison G. Guidelines can harm patients too. BMJ (Clinical research ed.). 2012  
24 Apr18;344: e2685.  
25

26  
27 16 Woolf SH, Grol R, Hutchinson A, Eccles M, Grimshaw J. Clinical guidelines.  
28 Potential benefits, limitations, and harms of clinical guidelines. BMJ 1999  
29 Feb20;318(7182):527-530  
30

31  
32 17 Miller L., Kidd A. Are sign guidelines key in the decision to CT? Post-head injury CT  
33 scanning within a paediatric population. Academic Emergency Medicine.  
34 Conference: 14th International Conference on Emergency Medicine, ICEM 2012  
35 Dublin Ireland. Conference Publication: 19 (6) (pp 776), 2012. Date of Publication:  
36 June 2012.  
37

38  
39 18 Thomson R., Eccles M., Wood R., Chinn D.J. A cautionary note on data sources for  
40 evidence-based clinical decisions: Warfarin and stroke prevention. MedDecis  
41 Making. 2007;27 (4): 438-447  
42

43  
44 19 Yudkin JS, Lipska KJ, Montori VM. The idolatry of the surrogate. BMJ. 2011  
45 Dec28;343:d7995  
46

47  
48 20 Cohen D. Rosiglitazone: what went wrong? BMJ.2010 Sep; 341:c4848  
49

50  
51 21 Gerstein HC, Miller ME, Byington RP, Goff DC Jr., Bigger JT, Buse JB, Cushman WC,  
52 Genuth S, Ismail-Beigi F, Grimm RH Jr. Probstfield JL, Simons-Morton DG, Friedewald  
53 WT. Effects of intensive glucose lowering in type 2 diabetes. Action to Control  
54 Cardiovascular Risk in Diabetes Study Group. New Engl J Med. 2008  
55 Jun12;358(24):2545-59  
56  
57  
58  
59  
60

---

22 Rashidian A, Eccles MP, Russell I. Falling on stony ground? A qualitative study of implementation of clinical guidelines' prescribing recommendations in primary care. Health Policy. 2008 Feb; 85 (2) 148-161

23 Guy S, Wardlaw JM. Who writes guidelines, and who should? ClinRadiol. 2002 Oct ;57 (10): 891-897.

24 Greenhalgh, Trisha. How To Read a Paper: The Basics of Evidence-Based Medicine. Wiley-Blackwell, fourth edition, 2010, p. 1

25 Zuiderent-Jerak T, Forland F, Macbeth F. Guidelines should reflect all knowledge, not just trials  
BMJ 2012;345:e6702

TABLE 2

| Number | Name                                                                                                                   | Pages | Main Recommendation |    |
|--------|------------------------------------------------------------------------------------------------------------------------|-------|---------------------|----|
|        |                                                                                                                        |       | A                   | B  |
| 133    | Management of hepatitis C                                                                                              | 57    | 20                  | 24 |
| 132    | Long-term follow-up of survivors of childhood cancer                                                                   | 62    | 0                   | 7  |
| 131    | Management of schizophrenia                                                                                            | 64    | 10                  | 19 |
| 130    | Brain injury rehabilitation in adults                                                                                  | 68    | 0                   | 14 |
| 129    | Antithrombotics: indication and management                                                                             | 68    | 25                  | 11 |
| 127    | Management of perinatal mood disorders                                                                                 | 47    | 0                   | 5  |
| 126    | Diagnosis and management of colorectal cancer                                                                          | 56    | 11                  | 19 |
| 125    | Management of atopic eczema in primary care                                                                            | 34    | 3                   | 5  |
| 124    | Management of adult testicular germ cell tumours                                                                       | 63    | 6                   | 6  |
| 123    | Management of early rheumatoid arthritis                                                                               | 27    | 3                   | 7  |
| 122    | Prevention and management of venous thromboembolism                                                                    | 88    | 26                  | 15 |
| 121    | Diagnosis and management of psoriasis and psoriatic arthritis in adults                                                | 65    | 11                  | 16 |
| 120    | Management of chronic venous leg ulcers                                                                                | 46    | 5                   | 3  |
| 119    | Management of patients with stroke: identification and management of dysphagia                                         | 42    | 0                   | 6  |
| 118    | Management of patients with stroke: rehabilitation, prevention and management of complications, and discharge planning | 101   | 21                  | 29 |
| 117    | Management of sore throat and indications for tonsillectomy                                                            | 37    | 9                   | 3  |
| 116    | Management of diabetes                                                                                                 | 161   | 57                  | 62 |
| 115    | Management of Obesity                                                                                                  | 87    | 6                   | 11 |
| 114    | Nonpharmaceutical management of depression                                                                             | 37    | 5                   | 4  |
| 113    | Diagnosis and pharmacological management of Parkinson's disease                                                        | 61    | 12                  | 6  |
| 112    | Management of attention deficit and hyperkinetic disorders in children and young people                                | 45    | 6                   | 4  |
| 111    | Management of hip fracture in old people                                                                               | 49    | 10                  | 9  |
| 110    | Early management of patients with a head injury                                                                        | 76    | 1                   | 7  |
| 109    | Management of genital Chlamydia trachomatis infection                                                                  | 40    | 3                   | 6  |
| 108    | Management of patients with stroke or TIA: assessment, investigation, immediate management and secondary prevention    | 100   | 42                  | 27 |
| 107    | Diagnosis and management of headache in adults                                                                         | 81    | 17                  | 16 |
| 106    | Control of pain in adults with cancer                                                                                  | 71    | 5                   | 7  |
| 105    | Management of acute upper and lower gastrointestinal bleeding                                                          | 57    | 14                  | 5  |
| 103    | Diagnosis and management of chronic kidney disease                                                                     | 50    | 9                   | 6  |
| 102    | Management of invasive meningococcal disease in children and young people                                              | 46    | 1                   | 4  |
| 99     | Management of cervical cancer                                                                                          | 73    | 1                   | 13 |
| 97     | Risk estimation and the prevention of cardiovascular disease                                                           | 72    | 16                  | 12 |
| 96     | Management of stable angina                                                                                            | 59    | 13                  | 10 |



|    |                                                                     |              |             |            |            |
|----|---------------------------------------------------------------------|--------------|-------------|------------|------------|
| 95 | Management of chronic heart failure                                 | 55           | 9           | 12         |            |
| 94 | Cardiac arrhythmias and coronary heart disease                      | 42           | 22          | 11         |            |
| 93 | Acute coronary syndromes                                            | 60           | 11          | 14         |            |
| 91 | Bronchiolitis in children                                           | 42           | 4           | 3          |            |
| 90 | Diagnosis and management of head and neck cancer                    | 92           | 42          | 8          |            |
| 89 | Diagnosis and management of peripheral arterial disease             | 37           | 11          | 2          |            |
| 88 | Management of suspected bacterial urinary tract infection in adults | 45           | 8           | 10         |            |
| 87 | Management of oesophageal and gastric cancer                        | 70           | 3           | 26         |            |
| 61 | Investigation of postmenopausal bleeding                            | 26           | 2           | 7          |            |
|    |                                                                     | <u>TOTAL</u> | <u>2559</u> | <u>480</u> | <u>491</u> |

TABLE 1.

| GRADES OF RECOMMENDATION |                                                                                                                                                                                                                                                                                              |
|--------------------------|----------------------------------------------------------------------------------------------------------------------------------------------------------------------------------------------------------------------------------------------------------------------------------------------|
| <b>A</b>                 | At least one meta-analysis, systematic review, or RCT rated as 1++, and directly applicable to the target population; or<br>A body of evidence consisting principally of studies rated as 1+, directly applicable to the target population, and demonstrating overall consistency of results |
| <b>B</b>                 | A body of evidence including studies rated as 2++, directly applicable to the target population and demonstrating overall consistency of results; or<br>Extrapolated evidence from studies rated as 1++ or 1+                                                                                |
| <b>C</b>                 | A body of evidence including studies rated as 2+, directly applicable to the target population and demonstrating overall consistency of results; or<br>Extrapolated evidence from studies rated as 2++                                                                                       |
| <b>D</b>                 | Evidence level 3 or 4; or<br>Extrapolated evidence from studies rated as 2+                                                                                                                                                                                                                  |

TABLE 2

## Levels of Evidence

|     |                                                                                                                                                |
|-----|------------------------------------------------------------------------------------------------------------------------------------------------|
| 1++ | High quality meta-analyses, systematic reviews of RCTs, or RCTs with a very low risk of bias                                                   |
| 1+  | Well conducted meta-analyses, systematic reviews, or RCTs with a low risk of bias                                                              |
| 1 - | -Meta-analyses, systematic reviews, or RCTs with a high risk of bias                                                                           |
| 2++ | High quality systematic reviews of case control or cohort studies                                                                              |
| 2+  | High quality case control or cohort studies with a very low risk of confounding or bias and a high probability that the relationship is causal |
| 2 - | Case control or cohort studies with a high risk of confounding or bias and a significant risk that the relationship is not causal              |
| 3   | Non-analytic studies, eg case reports, case series                                                                                             |
| 4   | Expert opinion                                                                                                                                 |

TABLE 3

Results -Number of recommendations in each category.

| Number | Number | Name                                                                                                                   | Pages       | Main Recommendations |            |            |            | Total       | %age D |
|--------|--------|------------------------------------------------------------------------------------------------------------------------|-------------|----------------------|------------|------------|------------|-------------|--------|
|        |        |                                                                                                                        |             | A                    | B          | C          | D          |             |        |
| 133    | 133    | Management of hepatitis C                                                                                              | 57          | 20                   | 24         | 7          | 52         | <b>103</b>  | 50.5%  |
| 132    | 132    | Long-term follow-up of survivors of childhood cancer                                                                   | 62          | 0                    | 7          | 9          | 14         | <b>30</b>   | 46.7%  |
| 131    | 131    | Management of schizophrenia                                                                                            | 64          | 10                   | 19         | 3          | 15         | <b>47</b>   | 31.9%  |
| 130    | 130    | Brain injury rehabilitation in adults                                                                                  | 68          | 0                    | 14         | 7          | 8          | <b>29</b>   | 27.6%  |
| 129    | 129    | Antithrombotics: indication and management                                                                             | 68          | 25                   | 11         | 6          | 19         | <b>61</b>   | 31.1%  |
| 127    | 127    | Management of perinatal mood disorders                                                                                 | 47          | 0                    | 5          | 6          | 15         | <b>26</b>   | 57.7%  |
| 126    | 126    | Diagnosis and management of colorectal cancer                                                                          | 56          | 11                   | 19         | 15         | 29         | <b>74</b>   | 39.2%  |
| 125    | 125    | Management of atopic eczema in primary care                                                                            | 34          | 3                    | 5          | 3          | 2          | <b>13</b>   | 15.4%  |
| 124    | 124    | Management of adult testicular germ cell tumours                                                                       | 63          | 6                    | 6          | 9          | 21         | <b>42</b>   | 50.0%  |
| 123    | 123    | Management of early rheumatoid arthritis                                                                               | 27          | 3                    | 7          | 2          | 0          | <b>12</b>   | 0.0%   |
| 122    | 122    | Prevention and management of venous thromboembolism                                                                    | 88          | 26                   | 15         | 14         | 55         | <b>110</b>  | 50.0%  |
| 121    | 121    | Diagnosis and management of psoriasis and psoriatic arthritis in adults                                                | 65          | 11                   | 16         | 6          | 26         | <b>59</b>   | 44.1%  |
| 120    | 120    | Management of chronic venous leg ulcers                                                                                | 46          | 5                    | 3          | 4          | 7          | <b>19</b>   | 36.8%  |
| 119    | 119    | Management of patients with stroke: identification and management of dysphagia                                         | 42          | 0                    | 6          | 4          | 20         | <b>30</b>   | 66.7%  |
| 118    | 118    | Management of patients with stroke: rehabilitation, prevention and management of complications, and discharge planning | 101         | 21                   | 29         | 7          | 21         | <b>78</b>   | 26.9%  |
| 117    | 117    | Management of sore throat and indications for tonsillectomy                                                            | 37          | 9                    | 3          | 4          | 4          | <b>20</b>   | 20.0%  |
| 116    | 116    | Management of diabetes                                                                                                 | 161         | 57                   | 62         | 23         | 16         | <b>158</b>  | 10.1%  |
| 115    | 115    | Management of Obesity                                                                                                  | 87          | 6                    | 11         | 7          | 11         | <b>35</b>   | 31.4%  |
| 114    | 114    | Nonpharmaceutical management of depression                                                                             | 37          | 5                    | 4          | 0          | 0          | <b>9</b>    | 0.0%   |
| 113    | 113    | Diagnosis and pharmacological management of Parkinson's disease                                                        | 61          | 12                   | 6          | 6          | 4          | <b>28</b>   | 14.3%  |
| 112    | 112    | Management of attention deficit and hyperkinetic disorders in children and young people                                | 45          | 6                    | 4          | 3          | 4          | <b>17</b>   | 23.5%  |
| 111    | 111    | Management of hip fracture in old people                                                                               | 49          | 10                   | 9          | 8          | 14         | <b>41</b>   | 34.1%  |
| 110    | 110    | Early management of patients with a head injury                                                                        | 76          | 1                    | 7          | 6          | 17         | <b>31</b>   | 54.8%  |
| 109    | 109    | Management of genital Chlamydia trachomatis infection                                                                  | 40          | 3                    | 6          | 9          | 29         | <b>47</b>   | 61.7%  |
| 108    | 108    | Management of patients with stroke or TIA: assessment, investigation, immediate management and secondary prevention    | 100         | 42                   | 27         | 18         | 14         | <b>101</b>  | 13.9%  |
| 107    | 107    | Diagnosis and management of headache in adults                                                                         | 81          | 17                   | 16         | 9          | 34         | <b>76</b>   | 44.7%  |
| 106    | 106    | Control of pain in adults with cancer                                                                                  | 71          | 5                    | 7          | 3          | 19         | <b>34</b>   | 55.9%  |
| 105    | 105    | Management of acute upper and lower gastrointestinal bleeding                                                          | 57          | 14                   | 5          | 2          | 15         | <b>36</b>   | 41.7%  |
| 103    | 103    | Diagnosis and management of chronic kidney disease                                                                     | 50          | 9                    | 6          | 4          | 3          | <b>22</b>   | 13.6%  |
| 102    | 102    | Management of invasive meningococcal disease in children and young people                                              | 46          | 1                    | 4          | 6          | 26         | <b>37</b>   | 70.3%  |
| 99     | 99     | Management of cervical cancer                                                                                          | 73          | 1                    | 13         | 19         | 29         | <b>62</b>   | 46.8%  |
| 97     | 97     | Risk estimation and the prevention of cardiovascular disease                                                           | 72          | 16                   | 12         | 2          | 4          | <b>34</b>   | 11.8%  |
| 96     | 96     | Management of stable angina                                                                                            | 59          | 13                   | 10         | 3          | 11         | <b>37</b>   | 29.7%  |
| 95     | 95     | Management of chronic heart failure                                                                                    | 55          | 9                    | 12         | 1          | 1          | <b>23</b>   | 4.3%   |
| 94     | 94     | Cardiac arrhythmias and coronary heart disease                                                                         | 42          | 22                   | 11         | 13         | 23         | <b>69</b>   | 33.3%  |
| 93     | 93     | Acute coronary syndromes                                                                                               | 60          | 11                   | 14         | 9          | 8          | <b>42</b>   | 19.0%  |
| 91     | 91     | Bronchiolitis in children                                                                                              | 42          | 4                    | 3          | 6          | 14         | <b>27</b>   | 51.9%  |
| 90     | 90     | Diagnosis and management of head and neck cancer                                                                       | 92          | 42                   | 8          | 26         | 60         | <b>136</b>  | 44.1%  |
| 89     | 89     | Diagnosis and management of peripheral arterial disease                                                                | 37          | 11                   | 2          | 0          | 4          | <b>17</b>   | 23.5%  |
| 88     | 88     | Management of suspected bacterial urinary tract infection in adults                                                    | 45          | 8                    | 10         | 2          | 10         | <b>30</b>   | 33.3%  |
| 87     | 87     | Management of oesophageal and gastric cancer                                                                           | 70          | 3                    | 26         | 23         | 28         | <b>80</b>   | 35.0%  |
| 61     | 61     | Investigation of postmenopausal bleeding                                                                               | 26          | 2                    | 7          | 4          | 4          | <b>17</b>   | 23.5%  |
|        |        |                                                                                                                        | <u>2559</u> | <u>480</u>           | <u>491</u> | <u>318</u> | <u>710</u> | <u>1999</u> |        |



### Guidelines – is bigger better? A review of SIGN guidelines.

|                                 |                                                                                                                                                                                                                                                            |
|---------------------------------|------------------------------------------------------------------------------------------------------------------------------------------------------------------------------------------------------------------------------------------------------------|
| Journal:                        | <i>BMJ Open</i>                                                                                                                                                                                                                                            |
| Manuscript ID:                  | bmjopen-2013-004278.R1                                                                                                                                                                                                                                     |
| Article Type:                   | Research                                                                                                                                                                                                                                                   |
| Date Submitted by the Author:   | 04-Dec-2013                                                                                                                                                                                                                                                |
| Complete List of Authors:       | Baird, Alastair; The White House, Lawrence, James; Dumfries & Galloway Royal Infirmary, Research & Development Support Unit                                                                                                                                |
| <b>Primary Subject Heading</b>: | Evidence based practice                                                                                                                                                                                                                                    |
| Secondary Subject Heading:      | General practice / Family practice                                                                                                                                                                                                                         |
| Keywords:                       | HEALTH SERVICES ADMINISTRATION & MANAGEMENT, Protocols & guidelines < HEALTH SERVICES ADMINISTRATION & MANAGEMENT, Quality in health care < HEALTH SERVICES ADMINISTRATION & MANAGEMENT, Clinical governance < HEALTH SERVICES ADMINISTRATION & MANAGEMENT |
|                                 |                                                                                                                                                                                                                                                            |

SCHOLARONE™  
Manuscripts

1  
2  
3  
4  
5 **SIGN Guidelines –analysis of evidence levels for their**  
6 **recommendations.**  
7

8  
9 *Alternatively*

10  
11  
12 **Guidelines – is bigger better? A review of SIGN national**  
13 **guidelines.**  
14

15  
16  
17  
18 Dr A Gordon Baird, MB ChB MRCOG FRCGP R&D General  
19 Practice Adviser, Research and Development Support Unit,  
20 Dumfries and Galloway Royal infirmary, Bankend Road,  
21 Dumfries, Scotland, UK DG1 4AP.  
22  
23  
24

25  
26 Address for correspondence; Dr A Gordon Baird, The White  
27 House, Sandhead, Wigtownshire UK. DG9 9JA. Email  
28 [gordon.baird@me.com](mailto:gordon.baird@me.com). Phone/fax 01776830281  
29  
30  
31

32  
33 Dr James R Lawrence, BSc MD FRCP(Glas & Edin) R&D Clinical  
34 Lead, Research and Development Support Unit, Dumfries and  
35 Galloway Royal infirmary, Bankend Road, Dumfries, Scotland,  
36 UK DG1 4AP.  
37  
38  
39

40 MeSH headings

41 General practice / Family practice

42 HEALTH SERVICES ADMINISTRATION & MANAGEMENT

43 Protocols & guidelines

44 Quality in health care

45 Clinical governance  
46  
47  
48  
49  
50  
51  
52  
53  
54  
55  
56  
57  
58  
59  
60

## **ABSTRACT**

### **Background**

National guidelines have become an integral part of UK general practice and aim to effectively deliver quality and consistency in clinical practice. As with any intervention, there are negative as well as positive consequences. Guideline effectiveness depends on the quality of evidence used.

### **Aim**

To quantify and analyse the quality of evidence that is presented in national guidelines.

### **Design and setting**

Levels of evidence used in all the current valid recommendations in the Scottish Intercollegiate Guideline Network (SIGN) guidelines were reviewed and statistically analysed.

### **Method**

The data was collected from published guidelines available online to the public. SIGN methodology entails a professional group selected by a national organisation to develop each of these guidelines. Statistical analysis of the relationship between the number of guideline recommendations and the quality of evidence used in its recommendations was performed.

### **Result**

A significant correlation between the number of recommendations in a guideline and the use of level D evidence was discovered.

### **Conclusion**

Practice guidelines should be brief and based on scientific evidence. Paradoxically the longest guidelines have the highest proportion of recommendations based on the lowest level of evidence. Guideline developers should be more aware of the need for brevity and a stricter application of evidence-based principles could achieve this. The findings support calls for a review of how evidence is used and presented in guidelines.

## **Article Summary**

### **Article focus**

Examines the hypothesis that larger guidelines rely disproportionately on poor evidence.

### **Key Messages**

- One third of current national guidelines are supported only by case reports, case studies and expert opinion.
- Guidelines with large numbers of recommendations used a higher proportion of weak evidence.
- Guideline development groups appear to vary in their approach to offering recommendations.
- Guideline recommendations should be based on good evidence.
- Paucity of evidence should highlight topics for research.

### **Strengths and limitations of the study**

#### **Strengths.**

- This is the first objective evidence of inconsistencies in approach by a national guideline developers
- This supports commentator suggestion that even without good evidence a group will prefer consensus.
- Adds to the current debate about how guidelines might be developed in the future

#### **Limitations.**

- The study is limited to only one set of national guidelines (SIGN).
- Reasons for the differences in quality of evidence preferred by the guideline development groups is unclear



## **Guidelines – is bigger better? A review of SIGN guidelines.**

### INTRODUCTION

The Scottish Intercollegiate Guidelines Network (SIGN) was founded in 1993. It is a national body, professionally led and publicly funded. SIGN's founding principles proposed direct links between evidence and recommendations, offering a brief and succinct quick-reference guide for clinicians<sup>1</sup>. Guidelines anticipated presenting brief, evidence based clinical advice. They have developed into long and authoritative texts used by managers and politicians to inform policy. SIGN has responsibility to consider cost-effectiveness and directly inputs to the Quality Outcomes Framework (QOF). A formal arrangement between SIGN and the National Institute of Clinical Excellence (NICE) has existed from 2003.

The World Health Organisation (WHO) recognises that current grades of recommendation (Table 1) may be ambiguous<sup>2</sup> and encourages guideline developers to use a system which includes a category "Use only in the context of research" where doubt exists.

Guideline developers have conflict of interest policies reported as challenging to apply. Where doubt exists, groups of specialists may feel consensus more defensible than acknowledging uncertainty.<sup>3</sup>

Even with the best evidence, concerns are expressed about the relevance of guidelines in treating patients with multiple morbidities<sup>4</sup>, and the emergence of the phenomenon of reversal<sup>5,6</sup>, where established practice, sometimes evidence based, is shown to be sub-optimal or harmful. This study looks at the quality of evidence used for SIGN guidelines, and describes a significant trend for some groups to emphasise poorly evidence-backed recommendations.

### METHODS

SIGN guidelines were accessed online in September 2013. SIGN guidelines were chosen because they are internationally respected, the authors were familiar with

1  
2  
3 their format and they contribute to national government policy. Guidelines that  
4 were "Current" and "Current 3-7 years. Some recommendations may be out of  
5 date." were included. Those that had been "Withdrawn", "Recommendations being  
6 updated", "Need for update being considered" and those with no recommendations  
7 were excluded.  
8  
9  
10

11  
12  
13 SIGN guideline 50 clearly describes an established process for developing  
14 guidelines.<sup>7</sup> It explains how the process is planned, how it is implemented and by  
15 whom. This process is independent of this study, but is stated to be an objective  
16 process. SIGN guidelines have four grades of recommendation outlined in table 1.  
17 Table 2 describes the level of evidence SIGN uses to support the recommendation  
18 grading. SIGN guideline development groups vary in size depending on the scope of  
19 the topic under consideration, but generally comprise between 15 and 25 members.  
20 SIGN states they are aware of the many psychosocial factors, including the problems  
21 of overcoming professional hierarchies that can affect small group processes.  
22  
23  
24  
25  
26  
27  
28  
29  
30

31 The level of evidence used by each examined guideline was independently  
32 enumerated by 3 investigators and discrepancies resolved. They discounted any  
33 duplication implicit in text-embedded key recommendations and also  
34 implementation recommendations. A statistical analysis of the correlation between  
35 the proportion of level D evidence and the total number of recommendations was  
36 performed for the 42 guidelines.  
37  
38  
39  
40  
41  
42

#### 43 RESULTS

44 The 42 guidelines consisted of 2559 pages (including references), ranging from 26 to  
45 161 (median 59.5) pages. The longest guideline, number 116 was 61 pages longer  
46 than the next largest. The number of recommendations per page ranged from 0.2 to  
47 1.8 (median 0.7). The number of recommendations per guideline is presented in  
48 table 3.  
49  
50  
51  
52  
53  
54

55  
56 Of the 1999 recommendations, 480 (24.0%) were level A, 491(24.6 %) were level B,  
57 318 (15.9%) level C, and 710 (35.5%) level D. Thus 51.4% were poorly evidenced  
58  
59  
60

1  
2  
3 (C&D) and over a third (D) developed almost entirely on “expert opinion”. The  
4 number of level A recommendations per guideline ranged from 0-57 (median 9),  
5 level B from 2-62 (median 8.5) level C ranged from 0-26 (median 6) and D from 0-60  
6 (median 14.5). 4 guidelines had no level A evidence.  
7  
8  
9

10  
11  
12 The proportion of level D evidence increases with the number of recommendations  
13 made. This correlation is significant with Kendall’s Tau=0.22 [approximate 95%  
14 confidence interval 0.008-0.45] p value =0.04, and Spearman rho=0.22 [approximate  
15 95% CI 0.02-0.57] p value= .04.  
16  
17  
18

## 19 20 21 DISCUSSION

22 This study reveals that expert groups who produce long guidelines rely on poor  
23 evidence more heavily than others. While this study only looks at SIGN, this study  
24 highlights a problem that has escaped national guideline developers, a wide range of  
25 professionals and the public to whom these guidelines are applied. National  
26 guidelines are useful and important and there is a debate about how evidence is  
27 best presented. Guidelines define standards of care, help busy clinicians and allow  
28 managers and politicians to develop governance. An American study (using 3 not 4  
29 levels of evidence) similarly found that 48% were “based on expert opinion, case  
30 studies, or standards of care.”<sup>8</sup>; we show comparable results for current SIGN  
31 guidelines. Where patients are involved in clinical decisions, honestly declaring  
32 uncertainty has merit. In the absence of good scientific evidence, recommending a  
33 course of action without understanding the circumstances of the individual to whom  
34 it is applied seems both risky and, assuming a right to patient choice, unwarranted.  
35 Other guidelines that use high levels of poor evidence should evaluate the  
36 proportion of poorly evidenced recommendations and seek explanations for such  
37 trends.  
38  
39  
40  
41  
42  
43  
44  
45  
46  
47  
48  
49  
50

51  
52 This study did not examine why longer guidelines use poorer evidence. Cloistered  
53 groups of experts may view their own opinion as more authoritative than science  
54 can support. It has been postulated that there is security in “just doing what  
55 everyone else is doing – even if what everyone else is doing isn’t very good.”<sup>3</sup>  
56  
57  
58  
59  
60

1  
2  
3 Reliance on expert opinion has a poor track record. Blinded by certainty, expert  
4 groups defining established practice have, in the past, perpetuated radical  
5 mastectomy instead of conservative surgery, Class 1C antiarrhythmics<sup>9</sup>, pulmonary  
6 artery catheters in heart failure<sup>10</sup>, electronic foetal monitoring in low risk  
7 pregnancies: even then practice can take a decade to reverse<sup>11</sup>.  
8  
9

10  
11  
12  
13  
14 Even good evidence is subject to the phenomenon of reversal where new evidence  
15 contradicts current practice. Reversal can affect around 13-16% of publications<sup>5,6</sup>.  
16 This may partly explain why the implementation of even the most soundly evidence  
17 based national guidelines fails to improve outcome<sup>12,13,14</sup>. There is potential  
18 harm<sup>15,16</sup> from guidelines in real clinical settings, for example increasing radiation  
19 dose without benefit<sup>17</sup> or increased risks of anticoagulation<sup>18</sup>.  
20  
21  
22  
23  
24

25  
26 SIGN 116 (diabetes), is a notable exception. It is more than 50% larger than the next  
27 largest, 2.5 times longer than the average and yet uses the 4<sup>th</sup> lowest level D  
28 recommendations. There are a number of hypotheses why this group reports  
29 differently. SIGN guidelines inform Quality Outcomes Framework (QOF) policy.  
30 Diabetes is the largest clinical UK QOF indicator and is associated with substantial  
31 payment incentives. The need for objective evaluation of performance drives a use  
32 of surrogate outcomes without appropriate clinical endpoints.<sup>19</sup> Diabetes guidelines  
33 have suffered several noteworthy reversals. Examples include the recommendation  
34 of glycosylated haemoglobin reduction resulting in increased use of rosiglitazone  
35 (still mentioned in the current document) both associated with harm<sup>20</sup> including  
36 mortality.<sup>21</sup> Aspirin recommendations have also been changed from previous  
37 guidelines. Is it possible that the repeated use of surrogate outcomes arises from  
38 group dynamics driven by a powerful external agenda?  
39  
40  
41  
42  
43  
44  
45  
46  
47  
48  
49

50  
51 Many doctors whose expertise cross several guidelines<sup>22,23</sup>, express concerns about  
52 guideline development groups. The inappropriate exclusion of disease groups from  
53 general population data is common. Smoking cessation advice for testicular cancer  
54 survivors is level C, although studies in the general population (without excepting  
55 specific disease groups) advises everyone to stop smoking. Overall smoking cessation  
56  
57  
58  
59  
60

1  
2  
3 was level D and C once each and B on three occasions. Using evidence in this way  
4 may imply group dysfunction. Differently constituted groups, or greater oversight  
5 might avoid problems.  
6  
7

8  
9  
10 In 1993, SIGN guidelines stated intention was to be evidence based, brief and  
11 succinct. Brevity increases value as a quick reference guide. Removing or reducing  
12 poorly evidenced recommendations would reduce size by more than a third overall  
13 and in some up to two thirds. The two volumes Oxford Textbook of Primary Medical  
14 Care (2005) is a relatively brief 1420 pages, more than a thousand less than the 2559  
15 pages of guidelines. Evidence based medicine is described as “the use of  
16 mathematical estimates of the risk of benefit and harm, derived from high-quality  
17 research on population samples, to inform clinical decision-making in the diagnosis,  
18 investigation or management of individual patients”<sup>24</sup>. Guidelines relevance to daily  
19 practice, the reliability of evidence and whether the application of evidence will  
20 improve outcomes are important questions.  
21  
22  
23  
24  
25  
26  
27  
28  
29

30  
31 These results may reflect how professional groups deal with uncertainty. If so, this is  
32 not good for individual patients faced with the same uncertainties (whether aware  
33 of it or not), nor is it good for scientists who actively seek unanswered questions by  
34 challenging established practice, an area in which medicine has a poor record from  
35 Semmelweis to the present day.  
36  
37  
38  
39

40  
41  
42 The finding of a significant increase of level D recommendations in larger guidelines  
43 has not happened by chance. A wider debate about how guideline groups can create  
44 greater clarity about the reliability of evidence used is needed.<sup>25</sup> Reducing the use of  
45 poorly evidenced recommendations has potential to create a shorter, more reliable  
46 and usable clinical support. The GRADE working group was formed in 2000.<sup>26</sup> SIGN  
47 proposed a move to a new grading system in 2001.<sup>27</sup> Whether the changes in  
48 process at present being considered will resolve the challenges that underpin the  
49 inconsistencies we have outlined remains to be seen.  
50  
51  
52  
53  
54  
55  
56  
57  
58  
59  
60

Table 1

**GRADES OF RECOMMENDATION**

|          |                                                                                                                                                                                                                                                                                              |
|----------|----------------------------------------------------------------------------------------------------------------------------------------------------------------------------------------------------------------------------------------------------------------------------------------------|
| <b>A</b> | At least one meta-analysis, systematic review, or RCT rated as 1++, and directly applicable to the target population; or<br>A body of evidence consisting principally of studies rated as 1+, directly applicable to the target population, and demonstrating overall consistency of results |
| <b>B</b> | A body of evidence including studies rated as 2++, directly applicable to the target population and demonstrating overall consistency of results; or<br>Extrapolated evidence from studies rated as 1++ or 1+                                                                                |
| <b>C</b> | A body of evidence including studies rated as 2+, directly applicable to the target population and demonstrating overall consistency of results; or<br>Extrapolated evidence from studies rated as 2++                                                                                       |
| <b>D</b> | Evidence level 3 or 4; or<br>Extrapolated evidence from studies rated as 2+                                                                                                                                                                                                                  |

Table 2

|            |                                                                                                                                                |
|------------|------------------------------------------------------------------------------------------------------------------------------------------------|
| <b>1++</b> | High quality meta-analyses, systematic reviews of RCTs, or RCTs with a very low risk of bias                                                   |
| <b>1+</b>  | Well conducted meta-analyses, systematic reviews, or RCTs with a low risk of bias                                                              |
| <b>1 -</b> | -Meta-analyses, systematic reviews, or RCTs with a high risk of bias                                                                           |
| <b>2++</b> | High quality systematic reviews of case control or cohort studies                                                                              |
| <b>2+</b>  | High quality case control or cohort studies with a very low risk of confounding or bias and a high probability that the relationship is causal |
| <b>2 -</b> | Case control or cohort studies with a high risk of confounding or bias and a significant risk that the relationship is not causal              |
| <b>3</b>   | Non-analytic studies, eg case reports, case series                                                                                             |
| <b>4</b>   | Expert opinion                                                                                                                                 |

Table 3

## Main Recommendations

| Number | Name                                                                                                                   | Pages       | A          | B          | C          | D          | Total       | %age D |
|--------|------------------------------------------------------------------------------------------------------------------------|-------------|------------|------------|------------|------------|-------------|--------|
| 133    | Management of hepatitis C                                                                                              | 57          | 20         | 24         | 7          | 52         | <b>103</b>  | 50.5%  |
| 132    | Long-term follow-up of survivors of childhood cancer                                                                   | 62          | 0          | 7          | 9          | 14         | <b>30</b>   | 46.7%  |
| 131    | Management of schizophrenia                                                                                            | 64          | 10         | 19         | 3          | 15         | <b>47</b>   | 31.9%  |
| 130    | Brain injury rehabilitation in adults                                                                                  | 68          | 0          | 14         | 7          | 8          | <b>29</b>   | 27.6%  |
| 129    | Antithrombotics: indication and management                                                                             | 68          | 25         | 11         | 6          | 19         | <b>61</b>   | 31.1%  |
| 127    | Management of perinatal mood disorders                                                                                 | 47          | 0          | 5          | 6          | 15         | <b>26</b>   | 57.7%  |
| 126    | Diagnosis and management of colorectal cancer                                                                          | 56          | 11         | 19         | 15         | 29         | <b>74</b>   | 39.2%  |
| 125    | Management of atopic eczema in primary care                                                                            | 34          | 3          | 5          | 3          | 2          | <b>13</b>   | 15.4%  |
| 124    | Management of adult testicular germ cell tumours                                                                       | 63          | 6          | 6          | 9          | 21         | <b>42</b>   | 50.0%  |
| 123    | Management of early rheumatoid arthritis                                                                               | 27          | 3          | 7          | 2          | 0          | <b>12</b>   | 0.0%   |
| 122    | Prevention and management of venous thromboembolism                                                                    | 88          | 26         | 15         | 14         | 55         | <b>110</b>  | 50.0%  |
| 121    | Diagnosis and management of psoriasis and psoriatic arthritis in adults                                                | 65          | 11         | 16         | 6          | 26         | <b>59</b>   | 44.1%  |
| 120    | Management of chronic venous leg ulcers                                                                                | 46          | 5          | 3          | 4          | 7          | <b>19</b>   | 36.8%  |
| 119    | Management of patients with stroke: identification and management of dysphagia                                         | 42          | 0          | 6          | 4          | 20         | <b>30</b>   | 66.7%  |
| 118    | Management of patients with stroke: rehabilitation, prevention and management of complications, and discharge planning | 101         | 21         | 29         | 7          | 21         | <b>78</b>   | 26.9%  |
| 117    | Management of sore throat and indications for tonsillectomy                                                            | 37          | 9          | 3          | 4          | 4          | <b>20</b>   | 20.0%  |
| 116    | Management of diabetes                                                                                                 | 161         | 57         | 62         | 23         | 16         | <b>158</b>  | 10.1%  |
| 115    | Management of Obesity                                                                                                  | 87          | 6          | 11         | 7          | 11         | <b>35</b>   | 31.4%  |
| 114    | Nonpharmaceutical management of depression                                                                             | 37          | 5          | 4          | 0          | 0          | <b>9</b>    | 0.0%   |
| 113    | Diagnosis and pharmacological management of Parkinson's disease                                                        | 61          | 12         | 6          | 6          | 4          | <b>28</b>   | 14.3%  |
| 112    | Management of attention deficit and hyperkinetic disorders in children and young people                                | 45          | 6          | 4          | 3          | 4          | <b>17</b>   | 23.5%  |
| 111    | Management of hip fracture in old people                                                                               | 49          | 10         | 9          | 8          | 14         | <b>41</b>   | 34.1%  |
| 110    | Early management of patients with a head injury                                                                        | 76          | 1          | 7          | 6          | 17         | <b>31</b>   | 54.8%  |
| 109    | Management of genital Chlamydia trachomatis infection                                                                  | 40          | 3          | 6          | 9          | 29         | <b>47</b>   | 61.7%  |
| 108    | Management of patients with stroke or TIA: assessment, investigation, immediate management and secondary prevention    | 100         | 42         | 27         | 18         | 14         | <b>101</b>  | 13.9%  |
| 107    | Diagnosis and management of headache in adults                                                                         | 81          | 17         | 16         | 9          | 34         | <b>76</b>   | 44.7%  |
| 106    | Control of pain in adults with cancer                                                                                  | 71          | 5          | 7          | 3          | 19         | <b>34</b>   | 55.9%  |
| 105    | Management of acute upper and lower gastrointestinal bleeding                                                          | 57          | 14         | 5          | 2          | 15         | <b>36</b>   | 41.7%  |
| 103    | Diagnosis and management of chronic kidney disease                                                                     | 50          | 9          | 6          | 4          | 3          | <b>22</b>   | 13.6%  |
| 102    | Management of invasive meningococcal disease in children and young people                                              | 46          | 1          | 4          | 6          | 26         | <b>37</b>   | 70.3%  |
| 99     | Management of cervical cancer                                                                                          | 73          | 1          | 13         | 19         | 29         | <b>62</b>   | 46.8%  |
| 97     | Risk estimation and the prevention of cardiovascular disease                                                           | 72          | 16         | 12         | 2          | 4          | <b>34</b>   | 11.8%  |
| 96     | Management of stable angina                                                                                            | 59          | 13         | 10         | 3          | 11         | <b>37</b>   | 29.7%  |
| 95     | Management of chronic heart failure                                                                                    | 55          | 9          | 12         | 1          | 1          | <b>23</b>   | 4.3%   |
| 94     | Cardiac arrhythmias and coronary heart disease                                                                         | 42          | 22         | 11         | 13         | 23         | <b>69</b>   | 33.3%  |
| 93     | Acute coronary syndromes                                                                                               | 60          | 11         | 14         | 9          | 8          | <b>42</b>   | 19.0%  |
| 91     | Bronchiolitis in children                                                                                              | 42          | 4          | 3          | 6          | 14         | <b>27</b>   | 51.9%  |
| 90     | Diagnosis and management of head and neck cancer                                                                       | 92          | 42         | 8          | 26         | 60         | <b>136</b>  | 44.1%  |
| 89     | Diagnosis and management of peripheral arterial disease                                                                | 37          | 11         | 2          | 0          | 4          | <b>17</b>   | 23.5%  |
| 88     | Management of suspected bacterial urinary tract infection in adults                                                    | 45          | 8          | 10         | 2          | 10         | <b>30</b>   | 33.3%  |
| 87     | Management of oesophageal and gastric cancer                                                                           | 70          | 3          | 26         | 23         | 28         | <b>80</b>   | 35.0%  |
| 61     | Investigation of postmenopausal bleeding                                                                               | 26          | 2          | 7          | 4          | 4          | <b>17</b>   | 23.5%  |
|        | <b>TOTAL</b>                                                                                                           | <b>2559</b> | <b>480</b> | <b>491</b> | <b>318</b> | <b>710</b> | <b>1999</b> |        |

### **Acknowledgements.**

Heather Barrington, Statistical Adviser; Bridget Bird, Administrative Assistant; Research and Development Support Unit, Dumfries and Galloway Royal infirmary, Bankend Road, Dumfries DG1 4AP.

Dr A Gordon Baird affirms that this manuscript is an honest, accurate, and transparent account of the study being reported; that no important aspects of the study have been omitted; any discrepancies from the study as planned have been explained.

### **Contributorship Statement**

**Both authors discussed the hypothesis that there was a disproportionate use of poor evidence in longer guidelines; both checked the raw data, and agreed on a statistical approach to discover whether the trend was significant or not. Both have been involved in writing and researching the evidence.**

### **Funding.**

This research received no specific grant from any funding agency in the public, commercial or not-for-profit sectors.

### **Data Sharing.**

Technical appendix, statistical code, and dataset available from the corresponding author, who will provide a permanent, citable and open access home for the dataset.

### **Competing interests**

No competing interests

### **MeSH Headings**

- Practice Guideline N04.761.700.350.650
- General Practice H02.403.340
- Evidence-Based Medicine H02.249.750

### **How this fits in.**

Guidelines should encourage an evidence-based approach to clinical practice. Longer guidelines used significantly higher levels of poor evidence. WHO has proposed a different system of grading evidence. The effect of group behavior altering guideline development has been hypothesised. New research often challenges established clinical practice. Improving the quality of evidence, acknowledging uncertainty and shortening guideline length would make guidelines more clinically relevant and effective.



## REFERENCES

- 1 Harbour R, Lowe G, Twaddle S. Scottish Intercollegiate Guidelines Network; the  
2 first 15 years (1993-2008). *J R Coll Physicians Edinb* 2011 Jun;41(2) 163-168
- 3  
4
- 5  
6  
7  
8  
9  
10  
11  
12  
13  
14  
15  
16  
17  
18  
19  
20  
21  
22  
23  
24  
25  
26  
27  
28  
29  
30  
31  
32  
33  
34  
35  
36  
37  
38  
39  
40  
41  
42  
43  
44  
45  
46  
47  
48  
49  
50  
51  
52  
53  
54  
55  
56  
57  
58  
59  
60
- 1 de Joncheere K, Hill S, Klazinga N, Mäkelä M, Oxman AD. The Clinical Guideline  
Programme of the National Institute for Health and Clinical Excellence (NICE) A  
review by the World Health Organization May 2006
- 3 Lenzer J. Why we can't trust clinical guidelines: *BMJ* 2013;346:f3830
- 4 Aylett V. Do geriatricians need guidelines? *BMJ* 2010 Sep;341 :c5340
- 5 Prasad V, Cifu, A, Ioannidis JP. Reversals of Established Medical Practices: Evidence  
to Abandon Ship. *JAMA*. 2012 Jan4;307(1):37-38,
- 6 Prasad V, Gall V, Cifu A. The frequency of medical reversal. *Arch Int Med*. 2011 Oct  
10;. 171(18): 1675-1676
- 7 SIGN 50: A guideline developer's handbook <http://www.sign.ac.uk/pdf/sign50.pdf>
- 8 Tricoci P, Allen JM, Kramer JM, Califf RM, Smith Jr. SC. Scientific evidence  
underlying the ACC/AHA clinical practice guidelines. *JAMA* 2009 Feb25; 301 (8): 831-  
841
- 9 Echt DS, Liebson PR, Mitchell LB, Peters RW, Obias-Manno D, Barker AH, Arensberg  
D, Baker A, Friedman L, Greene HL, Huther ML, Richardson DW. Mortality and  
morbidity in patients receiving encainide, flecainide, or placebo - The Cardiac  
Arrhythmia Suppression Trial. *New Eng J Med*. 1991 Mar21; 324 (12): 781-788
- 10 Binanay C, Califf RM, Hasselblad V, O'Connor CM, Shah MR, Sopko G, Stevenson  
LW, Francis GS, Leier CV, Miller LW Evaluation study of congestive heart failure and  
pulmonary artery catheterization effectiveness: the ESCAPE trial. *JAMA*. 2005 Oct  
5;294(13):1625-33.
- 11 Tatsioni A, Bonitsis NG, Ioannidis JA. Persistence of Contradicted Claims in the  
Literature. *JAMA*. 2007 Dec5 ;298(21):2517-2526.
- 12 Anderson JE, McKenzie C, Singh N, Gajree N, Giles L, Sharma P, McDonald A.  
Compliance with the 62 day target does not improve long-term survival. Association  
of Coloproctology of Great Britain and Ireland Annual Meeting 2012 Dublin Ireland.
- 13 Kerr J, Smith R, Gray S, Beard D, Robertson CE. An audit of clinical practice in the  
management of head injured patients following the introduction of the Scottish  
Intercollegiate Guidelines Network (SIGN) recommendations. *Emerg Med J*. 2005  
Dec; 22(12):850-854

1  
2  
3  
4  
5 14 Caplan LR. How well does "evidence-based" medicine help neurologists care for  
6 individual patients? *Revin Neurol Dis.*2007;4(2):75-84  
7

8  
9 15 Hutchison G. Guidelines can harm patients too. *BMJ (Clinical research ed.)*. 2012  
10 Apr18;344: e2685.  
11

12 16 Woolf SH, Grol R, Hutchinson A, Eccles M, Grimshaw J. Clinical guidelines.  
13 Potential benefits, limitations, and harms of clinical guidelines. *BMJ* 1999  
14 Feb20;318(7182):527-530  
15

16  
17 17 Miller L., Kidd A. Are sign guidelines key in the decision to CT? Post-head injury CT  
18 scanning within a paediatric population. *Academic Emergency Medicine*.  
19 Conference: 14th International Conference on Emergency Medicine, ICEM 2012  
20 Dublin Ireland. Conference Publication: 19 (6) (pp 776), 2012. Date of Publication:  
21 June 2012.  
22

23  
24 18 Thomson R., Eccles M., Wood R., Chinn D.J. A cautionary note on data sources for  
25 evidence-based clinical decisions: Warfarin and stroke prevention. *MedDecis*  
26 *Making*. 2007;27 (4): 438-447  
27

28  
29 19 Yudkin JS, Lipska KJ, Montori VM. The idolatry of the surrogate. *BMJ*. 2011  
30 Dec28;343:d7995  
31

32 20 Cohen D. Rosiglitazone: what went wrong? *BMJ*.2010 Sep; 341:c4848  
33

34  
35 21 Gerstein HC, Miller ME, Byington RP, Goff DC Jr., Bigger JT, Buse JB, Cushman WC,  
36 Genuth S, Ismail-Beigi F, Grimm RH Jr. Probstfield JL, Simons-Morton DG, Friedewald  
37 WT. Effects of intensive glucose lowering in type 2 diabetes. Action to Control  
38 Cardiovascular Risk in Diabetes Study Group. *New Engl J Med*. 2008  
39 Jun12;358(24):2545-59  
40

41  
42 22 Rashidian A, Eccles MP, Russell I. Falling on stony ground? A qualitative study of  
43 implementation of clinical guidelines' prescribing recommendations in primary care.  
44 *Health Policy*.2008 Feb; 85 (2) 148-161  
45

46  
47 23 Guy S, Wardlaw JM. Who writes guidelines, and who should? *ClinRadiol*. 2002 Oct  
48 ;57 (10): 891-897.  
49

50 24 Greenhalgh, Trisha. *How To Read a Paper: The Basics of Evidence-Based*  
51 *Medicine*. Wiley-Blackwell, fourth edition, 2010, p. 1  
52

53  
54 25 Zuiderent-Jerak T, Forland F, Macbeth F. Guidelines should reflect all knowledge,  
55 not just trials *BMJ* 2012;345:e6702  
56

57 26 GRADE working group [http://www.gradeworkinggroup.org/about\\_us.htm](http://www.gradeworkinggroup.org/about_us.htm)  
58  
59  
60

1  
2  
3  
4  
5 27 Harbour R, Miller J. A new system for grading recommendations in evidence  
6 based guidelines. BMJ. 2001 Aug 11;323(7308):334-6.  
7  
8  
9  
10  
11  
12  
13  
14  
15  
16  
17  
18  
19  
20  
21  
22  
23  
24  
25  
26  
27  
28  
29  
30  
31  
32  
33  
34  
35  
36  
37  
38  
39  
40  
41  
42  
43  
44  
45  
46  
47  
48  
49  
50  
51  
52  
53  
54  
55  
56  
57  
58  
59  
60

---

1  
2  
3  
4  
5  
6 **SIGN Guidelines –analysis of evidence levels for their**  
7 **recommendations.**  
8

9  
10 *Alternatively*

11  
12 **Guidelines – is bigger better? A review of SIGN national**  
13 **guidelines.**  
14  
15  
16  
17  
18  
19

20  
21  
22 **National Guidelines – How evidence based are they?**  
23  
24  
25  
26  
27  
28  
29  
30  
31  
32  
33  
34

35 Dr A Gordon Baird, MB ChB MRCOG FRCGP R&D General  
36 Practice Adviser, Research and Development Support Unit,  
37 Dumfries and Galloway Royal infirmary, Bankend Road,  
38 Dumfries Scotland, UK DG1 4AP.  
39

40  
41  
42 Address for correspondence; Dr A Gordon Baird, The White  
43 House, Sandhead, Wigtownshire UK. DG9 9JA. Email  
44 gordon.baird@me.com. Phone/fax 01776830281  
45  
46  
47

48 Dr James R Lawrence, BSc MD FRCP(Glas & Edin) R&D Clinical  
49 Lead, Research and Development Support Unit, Dumfries and  
50 Galloway Royal infirmary, Bankend Road, Dumfries Scotland,  
51 UK DG1 4AP.  
52  
53  
54

Formatted: Justified

1  
2  
3  
4  
5  
6  
7  
8  
9  
10  
11  
12  
13  
14  
15  
16  
17  
18  
19  
20  
21  
22  
23  
24  
25  
26  
27  
28  
29  
30  
31  
32  
33  
34  
35  
36  
37  
38  
39  
40  
41  
42  
43  
44  
45  
46  
47  
48  
49  
50  
51  
52  
53  
54  
55  
56  
57  
58  
59  
60

MeSH headings  
General practice / Family practice  
HEALTH SERVICES ADMINISTRATION & MANAGEMENT  
Protocols & guidelines  
Quality in health care  
Clinical governance

For peer review only

Formatted: Justified

## **ABSTRACT**

### **Background**

National guidelines have become an integral part of UK general practice and aim to deliver quality and consistency ~~within practices~~ in clinical practice. As with any intervention, there are negative as well as positive consequences. Guideline effectiveness depends on the quality of evidence used.

### **Aim**

To quantify and analyse the quality of evidence that is presented in national guidelines.

### **Design and setting**

Levels of evidence used in all the current valid recommendations in the Scottish Intercollegiate Guideline Network (SIGN) guidelines were reviewed and statistically analysed.

### **Method**

The data was collected from published guidelines available online to the public. A SIGN methodology entails a professional group selected by a national organisation develops each of these guidelines. Statistical analysis of the relationship between the number of guideline recommendations and the quality of evidence used in its recommendations was performed.

### **Result**

A significant correlation between the number of recommendations in a guideline and the use of level D evidence was discovered.

### **Conclusion**

Practice guidelines should be brief and based on scientific evidence. Paradoxically the longest guidelines have the highest proportion of recommendations based on the lowest level of evidence. Guideline developers should be more aware of the need for brevity and a stricter application of evidence-based principles could achieve this. The findings support calls for a review of how evidence is used and presented in guidelines.

Dr A Gordon Baird affirms that this manuscript is an honest, accurate, and transparent account of the study being reported; that no important aspects of the study have been omitted; any discrepancies from the study as planned have been explained.

The data is in the public domain; there were no ethical conflicts; there was no funding.

## Article Summary

### **Article focus**

Examines the hypothesis that larger guidelines rely disproportionately on poor evidence.

### **Key Messages**

- One third of current national guidelines ~~is~~are supported only by case reports, case studies and expert opinion.
- Guidelines with large numbers of recommendations are more likely to use weak evidence.
- Guideline development groups appear to vary in their approach to offering recommendations.
- Guideline recommendations should be based on good evidence.
- Without good science scientific evidence, avoiding a recommendation or highlighting the need for research should be considered.

### **Strengths and limitations of the study**

#### Strengths.

- This is the first objective evidence of inconsistencies in approach by national guideline developers
- This supports commentator suggestion that even without good evidence a group will prefer consensus.
- Adds to the current debate about how guidelines might be developed in the future

#### Limitations.

- The study is limited to only one set of national guidelines.
- Reasons for the differences in quality of evidence preferred by the guideline development groups is unclear

Formatted: Left

**Guidelines – is bigger better? A review of SIGN guidelines.**  
**SIGN Guidelines – How evidence based are they?**

INTRODUCTION

The Scottish Intercollegiate Guidelines Network (SIGN) was founded in 1993. It is a national body, professionally led and publicly funded. SIGN’s founding principles proposed direct links between evidence and recommendations, offering a brief and succinct quick-reference guide for clinicians<sup>1</sup>. Guidelines anticipated presenting brief, evidence based clinical advice. They have developed into long and authoritative texts ~~that are~~ used by managers and politicians to inform policy. SIGN has responsibility to consider cost-effectiveness and directly inputs to the Quality Outcomes Framework (QOF). A formal arrangement between SIGN and the National Institute of Clinical Excellence (NICE) has existed from 2003. ~~SIGN has no responsibility to consider cost-effectiveness and no direct input into the Quality Outcomes Framework (QOF). A formal arrangement between SIGN and the National Institute of Clinical Excellence (NICE) has existed from 2003.~~

The World Health Organisation (WHO) recognises that current grades of recommendation categories (Table 1) may be ambiguous<sup>2</sup> and has encouraged guideline developers to use a different form of grading, including a category “Use only in the context of research” where doubt exists.

Guideline developers have conflict of interest policies reported as challenging to apply. Where doubt exists, groups of specialists may feel consensus more defensible than acknowledging uncertainty.<sup>3</sup>

Even with the best evidence, concerns are expressed about the relevance of guidelines in treating patients with multiple morbidities<sup>4</sup>, and the emergence of the phenomenon of reversal<sup>5,6</sup>, where established practice, sometimes evidence based,



1  
2  
3  
4  
5  
6 is shown to be sub-optimal or harmful. This study looks at the quality of evidence  
7 used for SIGN guidelines, and describes a significant trend for some groups to  
8 emphasise poorly evidence-backed recommendations.  
9  
10

#### 11 12 13 14 15 16 METHODS

17 SIGN guidelines were accessed online in September 2013. SIGN guidelines were  
18 chosen because they are internationally respected, the authors were familiar with  
19 their format and they contribute to national government policy. Guidelines that  
20 were "Current" and "Current 3-7 years. Some recommendations may be out of  
21 date." ~~in September 2013~~ were included. Those that had been "Withdrawn",  
22 "Recommendations being updated", "Need for update being considered" and those  
23 with no recommendations were excluded. Key recommendations and  
24 implementation recommendations were excluded.  
25  
26  
27  
28  
29  
30

31 SIGN guideline 50 clearly describes an established process for developing  
32 guidelines.<sup>7</sup> It explains how the process is planned, how it is implemented and by  
33 whom. This process is independent of this study, but is stated to be an objective  
34 process. SIGN guidelines have four grades of recommendation outlined in table 1.  
35 Table 2 describes the level of evidence SIGN uses to support the recommendation  
36 grading. SIGN guideline development groups vary in size depending on the scope of  
37 the topic under consideration, but generally comprise between 15 and 25 members.  
38 SIGN states they are aware of the many psychosocial factors, including the problems  
39 of overcoming professional hierarchies that can affect small group processes.  
40 ~~SIGN guideline 50 describes an established process for developing guidelines.<sup>8</sup> This~~  
41 ~~process is independent of this study, but is stated to be an objective process. SIGN~~  
42 ~~guidelines have four grades of recommendation outlined in table 1. Table 2~~  
43 ~~describes the level of evidence supporting the recommendation grading.~~  
44  
45  
46  
47  
48  
49  
50  
51  
52  
53  
54  
55  
56  
57  
58  
59  
60

1  
2  
3  
4  
5  
6 The level of evidence used by each examined guideline was independently  
7 enumerated by 3 investigators and discrepancies resolved~~used by each guideline~~  
8 ~~was independently recorded by 3 investigators and errors resolved.~~ They discounted  
9 any duplication implicit in text-embedded key recommendations and also  
10 implementation Arecommendations. A statistical analysis of the correlation between  
11 the proportion of level D evidence and the total number of recommendations was  
12 performed for the 42 guidelines.  
13  
14  
15  
16  
17

## 18 RESULTS

19  
20 The 42 guidelines consisted of 2559 pages (including references), ranging from 26 to  
21 161 (median 59.5) pages. The longest guideline, number 116 was 61 pages longer  
22 than the next largest. The number of recommendations per page ranged from 0.2 to  
23 1.8 (median 0.7). The number of recommendations per guideline is presented in  
24 table 3.  
25  
26  
27

28  
29 Of the 1999 recommendations, 480 (24.0%) were level A, 491(24.6 %) were level B,  
30 318 (15.9%) level C, and 710 (35.5%) level D. Thus 51.4% ~~40.2%~~ were poorly  
31 evidenced (C&D) and over a third (D) developed almost entirely on “expert opinion”.  
32 The number of level A recommendations per guideline ranged from 0-57 (median 9),  
33 level B from 2-62 (median 8.5) level C ranged from 0-26 (median 6) and D from 0-60  
34 (median 14.5). 4 guidelines had no level A evidence.  
35  
36  
37  
38  
39

40 The proportion of level D evidence increases with the number of recommendations  
41 made. This correlation is significant with Kendall’s Tau=0.22 [approximate 95%  
42 confidence interval 0.008-0.45] p value =0.04, and Spearman rho=0.22 [approximate  
43 95% CI 0.02-0.57] p value= .04.  
44  
45  
46  
47

## 48 DISCUSSION

49 This study reveals that expert groups who produce long guidelines rely on poor  
50 evidence more heavily than others. While this study only looks at SIGN, this study  
51 highlights a problem that has escaped national guideline developers, a wide range of  
52 professionals and the public to whom these guidelines are applied. National  
53  
54  
55  
56  
57  
58  
59  
60

1  
2  
3  
4  
5  
6 guidelines are useful and important and there is a debate about how evidence is  
7 best presented. ~~Guidelines~~Guidelines define standards of care, help busy clinicians  
8 and allow managers and politicians to develop governance. An American study  
9 (using 3 not 4 levels of evidence) similarly found that 48% were “based on expert  
10 opinion, case studies, or standards of care.”<sup>9</sup> we show comparable results for  
11 current SIGN guidelines. Where patients are involved in clinical decisions, honestly  
12 declaring uncertainty has merit. In the absence of good scientific evidence,  
13 recommending a course of action without understanding the circumstances of the  
14 individual to whom it is applied seems both risky and, assuming a right to patient  
15 choice, unwarranted~~imbalanced~~.  
16  
17 Other guidelines that use high levels of poor evidence should evaluate the  
18 proportion of poorly evidenced recommendations and seek explanations for such  
19 trends.  
20  
21  
22  
23  
24  
25  
26  
27

28 This study did not examine why longer guidelines use poorer evidence. Cloistered  
29 groups of experts may view their own opinion as more authoritative than science  
30 can support. It has been postulated that there is security in “just doing what  
31 everyone else is doing – even if what everyone else is doing isn’t very good.”<sup>3</sup>  
32  
33 ~~Cloistered groups of experts may view their own opinion as more authoritative than~~  
34 ~~science can support.~~ Reliance on expert opinion has a poor track record. Blinded by  
35 certainty, expert groups defining established practice have perpetuated radical  
36 mastectomy instead of conservative surgery, Class 1C antiarrhythmics<sup>10</sup>, pulmonary  
37 artery catheters in heart failure<sup>11</sup>, electronic foetal monitoring in low risk  
38 pregnancies: even then practice can take a decade to reverse<sup>12</sup>.  
39  
40  
41  
42  
43  
44

45 Even good evidence is subject to the phenomenon of reversal where new evidence  
46 contradicts current practice. Reversal can affect around 13-16% of publications<sup>5,6</sup>.  
47 This may partly explain why the implementation of even the most soundly evidence  
48 based national guidelines fails to improve outcome<sup>13,14,15</sup>. There is potential  
49 harm<sup>16,17</sup> from guidelines in real clinical settings, for example increasing radiation  
50 dose without benefit<sup>18</sup> or increased risks of anticoagulation<sup>19</sup>.  
51  
52  
53  
54  
55  
56  
57  
58  
59  
60

1  
2  
3  
4  
5  
6 SIGN 116 (diabetes), is a notable exception. It is more than 50% larger than the next  
7 largest, 2.5 times longer than the average and yet uses the 4<sup>th</sup> lowest level D  
8 recommendations. There are a number of hypotheses why this group reports  
9 differently. ~~SIGN guidelines inform Quality Outcomes Framework (QOF) policy~~  
10 ~~The advisory committee to SIGN's English equivalent (NICE) informs Quality Outcomes~~  
11 ~~Framework (QOF) policy.~~ Diabetes is the largest clinical UK QOF indicator and is  
12 associated with substantial payment incentives. The need for objective evaluation of  
13 performance drives a use of surrogate outcomes without appropriate clinical  
14 endpoints.<sup>20</sup> Diabetes guidelines have suffered several noteworthy reversals.  
15 Examples include the recommendation of glycosylated haemoglobin reduction  
16 resulting in increased use of rosiglitazone (still mentioned in the current document)  
17 both associated with harm<sup>21</sup> including mortality.<sup>22</sup> Aspirin recommendations have  
18 also been changed from previous guidelines. Is it possible that the repeated use of  
19 surrogate outcomes arises from group dynamics driven by a powerful external  
20 agenda?  
21  
22  
23  
24  
25  
26  
27  
28  
29  
30

31 Many doctors whose expertise cross several guidelines<sup>23,24</sup>, express concerns about  
32 guideline development groups. The inappropriate exclusion of disease groups from  
33 general population data is common. Smoking cessation advice for testicular cancer  
34 survivors is level C, although studies in the general population (without excepting  
35 specific disease groups) advises everyone to stop smoking. Overall smoking cessation  
36 was level D and C once each and B on three occasions. Using evidence in this way  
37 may imply group dysfunction. Differently constituted groups, or greater oversight  
38 might avoid problems.  
39  
40  
41  
42  
43  
44

45 In 1993, SIGN guidelines stated intention was to be evidence based, brief and  
46 succinct. Brevity increases value as a quick reference guide. Removing or reducing  
47 poorly evidenced recommendations would reduce size by more than a third overall  
48 and in some up to two thirds. ~~The two volumes Oxford Textbook of Primary Medical~~  
49 ~~Care (2005) is a relatively brief 1420 pages, more than a thousand less than the 2559~~  
50 ~~pages of guidelines. 2559 pages is longer than the Oxford Textbook of Primary~~  
51 ~~Medical Care.~~ Evidence based medicine is described as “the use of mathematical  
52  
53  
54  
55  
56  
57  
58  
59  
60

1  
2  
3  
4  
5  
6 estimates of the risk of benefit and harm, derived from high-quality research on  
7 population samples, to inform clinical decision-making in the diagnosis, investigation  
8 or management of individual patients<sup>25</sup>. Guidelines relevance to daily practice, the  
9 reliability of evidence and whether the application of evidence will improve  
10 outcomes are important questions.  
11  
12  
13

14  
15  
16 These results may reflect how professional groups deal with uncertainty. If so, this is  
17 not good for individual patients faced with the same uncertainties (whether aware  
18 of it or not), nor is it good for scientists who actively seek unanswered questions by  
19 challenging established practice, an area in which medicine has a poor record from  
20 Semmelweis to the present day.  
21  
22  
23

24  
25 The finding of a significant increase of level D recommendations in larger guidelines  
26 has not happened by chance. A wider debate about how guideline groups can create  
27 greater clarity about the reliability of evidence used is needed.<sup>26</sup> Reducing the use of  
28 poorly evidenced recommendations has potential to create a shorter, more reliable  
29 and usable clinical support. The GRADE working group was formed in 2000.<sup>27</sup> SIGN  
30 proposed a move to a new grading system in 2001.<sup>28</sup> Whether the changes in  
31 process at present being considered will resolve the challenges that underpin the  
32 inconsistencies we have outlined remains to be seen.  
33  
34  
35  
36  
37  
38  
39

40 Acknowledgements.

41  
42 Heather Barrington, Statistical Adviser; Bridget Bird, Administrative Assistant;  
43 Research and Development Support Unit, Dumfries and Galloway Royal infirmary,  
44 Bankend Road, Dumfries DG1 4AP.  
45  
46  
47

48  
49 Conflict of interest; none  
50  
51  
52  
53  
54  
55  
56  
57  
58  
59  
60

Table 1

**GRADES OF RECOMMENDATION**

|          |                                                                                                                                                                                                                                                                                              |
|----------|----------------------------------------------------------------------------------------------------------------------------------------------------------------------------------------------------------------------------------------------------------------------------------------------|
| <b>A</b> | At least one meta-analysis, systematic review, or RCT rated as 1++, and directly applicable to the target population; or<br>A body of evidence consisting principally of studies rated as 1+, directly applicable to the target population, and demonstrating overall consistency of results |
| <b>B</b> | A body of evidence including studies rated as 2++, directly applicable to the target population and demonstrating overall consistency of results; or<br>Extrapolated evidence from studies rated as 1++ or 1+                                                                                |
| <b>C</b> | A body of evidence including studies rated as 2+, directly applicable to the target population and demonstrating overall consistency of results; or<br>Extrapolated evidence from studies rated as 2++                                                                                       |
| <b>D</b> | Evidence level 3 or 4; or<br>Extrapolated evidence from studies rated as 2+                                                                                                                                                                                                                  |

Table 2

|            |                                                                                                                                                |
|------------|------------------------------------------------------------------------------------------------------------------------------------------------|
| <b>1++</b> | High quality meta-analyses, systematic reviews of RCTs, or RCTs with a very low risk of bias                                                   |
| <b>1+</b>  | Well conducted meta-analyses, systematic reviews, or RCTs with a low risk of bias                                                              |
| <b>1 -</b> | -Meta-analyses, systematic reviews, or RCTs with a high risk of bias                                                                           |
| <b>2++</b> | High quality systematic reviews of case control or cohort studies                                                                              |
| <b>2+</b>  | High quality case control or cohort studies with a very low risk of confounding or bias and a high probability that the relationship is causal |
| <b>2 -</b> | Case control or cohort studies with a high risk of confounding or bias and a significant risk that the relationship is not causal              |
| <b>3</b>   | Non-analytic studies, eg case reports, case series                                                                                             |
| <b>4</b>   | Expert opinion                                                                                                                                 |

Table 3

Main Recommendations

For peer review only

1  
2  
3  
4  
5  
6  
7  
8  
9  
10  
11  
12  
13  
14  
15  
16  
17  
18  
19  
20  
21  
22  
23  
24  
25  
26  
27  
28  
29  
30  
31  
32  
33  
34  
35  
36  
37  
38  
39  
40  
41  
42  
43  
44  
45  
46  
47  
48  
49  
50  
51  
52  
53  
54  
55  
56  
57  
58  
59  
60

| Number | Name                                                                                                                   | Pages        | A           | B          | C          | D          | Total      | %age D      |
|--------|------------------------------------------------------------------------------------------------------------------------|--------------|-------------|------------|------------|------------|------------|-------------|
| 133    | Management of hepatitis C                                                                                              | 57           | 20          | 24         | 7          | 52         | <b>103</b> | 50.5%       |
| 132    | Long-term follow-up of survivors of childhood cancer                                                                   | 62           | 0           | 7          | 9          | 14         | <b>30</b>  | 46.7%       |
| 131    | Management of schizophrenia                                                                                            | 64           | 10          | 19         | 3          | 15         | <b>47</b>  | 31.9%       |
| 130    | Brain injury rehabilitation in adults                                                                                  | 68           | 0           | 14         | 7          | 8          | <b>29</b>  | 27.6%       |
| 129    | Antithrombotics: indication and management                                                                             | 68           | 25          | 11         | 6          | 19         | <b>61</b>  | 31.1%       |
| 127    | Management of perinatal mood disorders                                                                                 | 47           | 0           | 5          | 6          | 15         | <b>26</b>  | 57.7%       |
| 126    | Diagnosis and management of colorectal cancer                                                                          | 56           | 11          | 19         | 15         | 29         | <b>74</b>  | 39.2%       |
| 125    | Management of atopic eczema in primary care                                                                            | 34           | 3           | 5          | 3          | 2          | <b>13</b>  | 15.4%       |
| 124    | Management of adult testicular germ cell tumours                                                                       | 63           | 6           | 6          | 9          | 21         | <b>42</b>  | 50.0%       |
| 123    | Management of early rheumatoid arthritis                                                                               | 27           | 3           | 7          | 2          | 0          | <b>12</b>  | 0.0%        |
| 122    | Prevention and management of venous thromboembolism                                                                    | 88           | 26          | 15         | 14         | 55         | <b>110</b> | 50.0%       |
| 121    | Diagnosis and management of psoriasis and psoriatic arthritis in adults                                                | 65           | 11          | 16         | 6          | 26         | <b>59</b>  | 44.1%       |
| 120    | Management of chronic venous leg ulcers                                                                                | 46           | 5           | 3          | 4          | 7          | <b>19</b>  | 36.8%       |
| 119    | Management of patients with stroke: identification and management of dysphagia                                         | 42           | 0           | 6          | 4          | 20         | <b>30</b>  | 66.7%       |
| 118    | Management of patients with stroke: rehabilitation, prevention and management of complications, and discharge planning | 101          | 21          | 29         | 7          | 21         | <b>78</b>  | 26.9%       |
| 117    | Management of sore throat and indications for tonsillectomy                                                            | 37           | 9           | 3          | 4          | 4          | <b>20</b>  | 20.0%       |
| 116    | Management of diabetes                                                                                                 | 161          | 57          | 62         | 23         | 16         | <b>158</b> | 10.1%       |
| 115    | Management of Obesity                                                                                                  | 87           | 6           | 11         | 7          | 11         | <b>35</b>  | 31.4%       |
| 114    | Nonpharmaceutical management of depression                                                                             | 37           | 5           | 4          | 0          | 0          | <b>9</b>   | 0.0%        |
| 113    | Diagnosis and pharmacological management of Parkinson's disease                                                        | 61           | 12          | 6          | 6          | 4          | <b>28</b>  | 14.3%       |
| 112    | Management of attention deficit and hyperkinetic disorders in children and young people                                | 45           | 6           | 4          | 3          | 4          | <b>17</b>  | 23.5%       |
| 111    | Management of hip fracture in old people                                                                               | 49           | 10          | 9          | 8          | 14         | <b>41</b>  | 34.1%       |
| 110    | Early management of patients with a head injury                                                                        | 76           | 1           | 7          | 6          | 17         | <b>31</b>  | 54.8%       |
| 109    | Management of genital Chlamydia trachomatis infection                                                                  | 40           | 3           | 6          | 9          | 29         | <b>47</b>  | 61.7%       |
| 108    | Management of patients with stroke or TIA: assessment, investigation, immediate management and secondary prevention    | 100          | 42          | 27         | 18         | 14         | <b>101</b> | 13.9%       |
| 107    | Diagnosis and management of headache in adults                                                                         | 81           | 17          | 16         | 9          | 34         | <b>76</b>  | 44.7%       |
| 106    | Control of pain in adults with cancer                                                                                  | 71           | 5           | 7          | 3          | 19         | <b>34</b>  | 55.9%       |
| 105    | Management of acute upper and lower gastrointestinal bleeding                                                          | 57           | 14          | 5          | 2          | 15         | <b>36</b>  | 41.7%       |
| 103    | Diagnosis and management of chronic kidney disease                                                                     | 50           | 9           | 6          | 4          | 3          | <b>22</b>  | 13.6%       |
| 102    | Management of invasive meningococcal disease in children and young people                                              | 46           | 1           | 4          | 6          | 26         | <b>37</b>  | 70.3%       |
| 99     | Management of cervical cancer                                                                                          | 73           | 1           | 13         | 19         | 29         | <b>62</b>  | 46.8%       |
| 97     | Risk estimation and the prevention of cardiovascular disease                                                           | 72           | 16          | 12         | 2          | 4          | <b>34</b>  | 11.8%       |
| 96     | Management of stable angina                                                                                            | 59           | 13          | 10         | 3          | 11         | <b>37</b>  | 29.7%       |
| 95     | Management of chronic heart failure                                                                                    | 55           | 9           | 12         | 1          | 1          | <b>23</b>  | 4.3%        |
| 94     | Cardiac arrhythmias and coronary heart disease                                                                         | 42           | 22          | 11         | 13         | 23         | <b>69</b>  | 33.3%       |
| 93     | Acute coronary syndromes                                                                                               | 60           | 11          | 14         | 9          | 8          | <b>42</b>  | 19.0%       |
| 91     | Bronchiolitis in children                                                                                              | 42           | 4           | 3          | 6          | 14         | <b>27</b>  | 51.9%       |
| 90     | Diagnosis and management of head and neck cancer                                                                       | 92           | 42          | 8          | 26         | 60         | <b>136</b> | 44.1%       |
| 89     | Diagnosis and management of peripheral arterial disease                                                                | 37           | 11          | 2          | 0          | 4          | <b>17</b>  | 23.5%       |
| 88     | Management of suspected bacterial urinary tract infection in adults                                                    | 45           | 8           | 10         | 2          | 10         | <b>30</b>  | 33.3%       |
| 87     | Management of oesophageal and gastric cancer                                                                           | 70           | 3           | 26         | 23         | 28         | <b>80</b>  | 35.0%       |
| 61     | Investigation of postmenopausal bleeding                                                                               | 26           | 2           | 7          | 4          | 4          | <b>17</b>  | 23.5%       |
|        |                                                                                                                        | <b>TOTAL</b> | <b>2559</b> | <b>480</b> | <b>491</b> | <b>318</b> | <b>710</b> | <b>1999</b> |



### **Contributorship Statement**

Both authors discussed the hypothesis that there was a disproportionate use of poor evidence in longer guidelines; both checked the raw data, and agreed on a statistical approach to discover whether the trend was significant or not. Both have been involved in writing and researching the evidence.

### **Funding.**

This research received no specific grant from any funding agency in the public, commercial or not-for-profit sectors.

### **Data Sharing.**

Technical appendix, statistical code, and dataset available from the corresponding author, who will provide a permanent, citable and open access home for the dataset.

### **Competing interests**

No competing interests

### **MeSH Headings**

- Practice Guideline N04.761.700.350.650
- General Practice H02.403.340
- Evidence-Based Medicine H02.249.750

### **How this fits in.**

Guidelines should encourage an evidence-based approach to clinical practice. Longer guidelines used significantly higher levels of poor evidence. WHO has proposed a different system of grading evidence. The effect of group behavior altering guideline development has been hypothesised. New research often challenges established clinical practice. Improving the quality of evidence, acknowledging uncertainty and shortening guideline length would make guidelines more clinically relevant and effective.

## REFERENCES

1 Harbour R, Lowe G, Twaddle S. Scottish Intercollegiate Guidelines Network; the first 15 years (1993-2008). J R Coll Physicians Edinb 2011 Jun;41(2) 163-168

2 de Joncheere K, Hill S, Klazinga N, Mäkelä M, Oxman AD. The Clinical Guideline Programme of the National Institute for Health and Clinical Excellence (NICE) A review by the World Health Organization May 2006

3 Lenzer J. Why we can't trust clinical guidelines: BMJ 2013;346:f3830

4 Aylett V. Do geriatricians need guidelines? BMJ 2010 Sep;341 :c5340

5 Prasad V, Cifu, A, Ioannidis JP. Reversals of Established Medical Practices: Evidence to Abandon Ship. JAMA. 2012 Jan4;307(1):37-38,

6 Prasad V, Gall V, Cifu A. The frequency of medical reversal. Arch Int Med. 2011 Oct 10;. 171(18): 1675-1676

7 [SIGN 50: A guideline developer's handbook http://www.sign.ac.uk/pdf/sign50.pdf](http://www.sign.ac.uk/pdf/sign50.pdf)

8 <http://www.sign.ac.uk/pdf/sign50.pdf>

9 Tricoci P, Allen JM, Kramer JM, Califf RM, Smith Jr. SC. Scientific evidence underlying the ACC/AHA clinical practice guidelines. JAMA 2009 Feb25; 301 (8): 831-841

10 Echt DS, Liebson PR, Mitchell LB, Peters RW, Obias-Manno D, Barker AH, Arensberg D, Baker A, Friedman L, Greene HL, Huther ML, Richardson DW. Mortality and morbidity in patients receiving encainide, flecainide, or placebo - The Cardiac Arrhythmia Suppression Trial. New Eng J Med. 1991 Mar21; 324 (12): 781-788

11 Binanay C, Califf RM, Hasselblad V, O'Connor CM, Shah MR, Sopko G, Stevenson LW, Francis GS, Leier CV, Miller LW Evaluation study of congestive heart failure and

1  
2  
3  
4  
5  
6  
7 pulmonary artery catheterization effectiveness: the ESCAPE trial. JAMA. 2005 Oct  
8 5;294(13):1625-33.  
9

10 12 Tatsioni A, Bonitsis NG, Ioannidis JA. Persistence of Contradicted Claims in the  
11 Literature. JAMA. 2007 Dec 5 ;298(21):2517-2526.  
12

13 13 Anderson JE, McKenzie C, Singh N, Gajree N, Giles L, Sharma P, McDonald A.  
14 Compliance with the 62 day target does not improve long-term survival. Association  
15 of Coloproctology of Great Britain and Ireland Annual Meeting 2012 Dublin Ireland.  
16

17 14 Kerr J, Smith R, Gray S, Beard D, Robertson CE. An audit of clinical practice in the  
18 management of head injured patients following the introduction of the Scottish  
19 Intercollegiate Guidelines Network (SIGN) recommendations. Emerg Med J. 2005  
20 Dec; 22(12):850-854  
21

22 15 Caplan LR. How well does "evidence-based" medicine help neurologists care for  
23 individual patients? Rev Neurol Dis. 2007;4(2):75-84  
24

25 16 Hutchison G. Guidelines can harm patients too. BMJ (Clinical research ed.). 2012  
26 Apr 18;344: e2685.  
27

28 17 Woolf SH, Grol R, Hutchinson A, Eccles M, Grimshaw J. Clinical guidelines.  
29 Potential benefits, limitations, and harms of clinical guidelines. BMJ 1999  
30 Feb 20;318(7182):527-530  
31

32 18 Miller L, Kidd A. Are sign guidelines key in the decision to CT? Post-head injury CT  
33 scanning within a paediatric population. Academic Emergency Medicine.  
34 Conference: 14th International Conference on Emergency Medicine, ICEM 2012  
35 Dublin Ireland. Conference Publication: 19 (6) (pp 776), 2012. Date of Publication:  
36 June 2012.  
37

38 19 Thomson R., Eccles M., Wood R., Chinn D.J. A cautionary note on data sources for  
39 evidence-based clinical decisions: Warfarin and stroke prevention. MedDecis  
40 Making. 2007;27 (4): 438-447  
41

42 20 Yudkin JS, Lipska KJ, Montori VM. The idolatry of the surrogate. BMJ. 2011  
43 Dec 28;343:d7995  
44

45 21 Cohen D. Rosiglitazone: what went wrong? BMJ. 2010 Sep; 341:c4848  
46

47 22 Gerstein HC, Miller ME, Byington RP, Goff DC Jr., Bigger JT, Buse JB, Cushman WC,  
48 Genuth S, Ismail-Beigi F, Grimm RH Jr. Probstfield JL, Simons-Morton DG, Friedewald  
49 WT. Effects of intensive glucose lowering in type 2 diabetes. Action to Control  
50 Cardiovascular Risk in Diabetes Study Group. New Engl J Med. 2008  
51 Jun 12;358(24):2545-59  
52  
53  
54  
55  
56  
57  
58  
59  
60

---

23 Rashidian A, Eccles MP, Russell I. Falling on stony ground? A qualitative study of implementation of clinical guidelines' prescribing recommendations in primary care. *Health Policy*. 2008 Feb; 85 (2) 148-161

24 Guy S, Wardlaw JM. Who writes guidelines, and who should? *ClinRadiol*. 2002 Oct ;57 (10): 891-897.

25 Greenhalgh, Trisha. *How To Read a Paper: The Basics of Evidence-Based Medicine*. Wiley-Blackwell, fourth edition, 2010, p. 1

26 Zuiderent-Jerak T, Forland F, Macbeth F. Guidelines should reflect all knowledge, not just trials  
BMJ 2012;345:e6702

TABLE 2

| Number | Name                                                                                                                   | Pages | Main Recommendations |    |    |    | Total      |
|--------|------------------------------------------------------------------------------------------------------------------------|-------|----------------------|----|----|----|------------|
|        |                                                                                                                        |       | A                    | B  | C  | D  |            |
| 133    | Management of hepatitis C                                                                                              | 57    | 20                   | 24 | 7  | 52 | <b>103</b> |
| 132    | Long-term follow-up of survivors of childhood cancer                                                                   | 62    | 0                    | 7  | 9  | 14 | <b>30</b>  |
| 131    | Management of schizophrenia                                                                                            | 64    | 10                   | 19 | 3  | 15 | <b>47</b>  |
| 130    | Brain injury rehabilitation in adults                                                                                  | 68    | 0                    | 14 | 7  | 8  | <b>29</b>  |
| 129    | Antithrombotics: indication and management                                                                             | 68    | 25                   | 11 | 6  | 19 | <b>61</b>  |
| 127    | Management of perinatal mood disorders                                                                                 | 47    | 0                    | 5  | 6  | 15 | <b>26</b>  |
| 126    | Diagnosis and management of colorectal cancer                                                                          | 56    | 11                   | 19 | 15 | 29 | <b>74</b>  |
| 125    | Management of atopic eczema in primary care                                                                            | 34    | 3                    | 5  | 3  | 2  | <b>13</b>  |
| 124    | Management of adult testicular germ cell tumours                                                                       | 63    | 6                    | 6  | 9  | 21 | <b>42</b>  |
| 123    | Management of early rheumatoid arthritis                                                                               | 27    | 3                    | 7  | 2  | 0  | <b>12</b>  |
| 122    | Prevention and management of venous thromboembolism                                                                    | 88    | 26                   | 15 | 14 | 55 | <b>110</b> |
| 121    | Diagnosis and management of psoriasis and psoriatic arthritis in adults                                                | 65    | 11                   | 16 | 6  | 26 | <b>59</b>  |
| 120    | Management of chronic venous leg ulcers                                                                                | 46    | 5                    | 3  | 4  | 7  | <b>19</b>  |
| 119    | Management of patients with stroke: identification and management of dysphagia                                         | 42    | 0                    | 6  | 4  | 20 | <b>30</b>  |
| 118    | Management of patients with stroke: rehabilitation, prevention and management of complications, and discharge planning | 101   | 21                   | 29 | 7  | 21 | <b>78</b>  |
| 117    | Management of sore throat and indications for tonsillectomy                                                            | 37    | 9                    | 3  | 4  | 4  | <b>20</b>  |
| 116    | Management of diabetes                                                                                                 | 161   | 57                   | 62 | 23 | 16 | <b>158</b> |
| 115    | Management of Obesity                                                                                                  | 87    | 6                    | 11 | 7  | 11 | <b>35</b>  |
| 114    | Nonpharmaceutical management of depression                                                                             | 37    | 5                    | 4  | 0  | 0  | <b>9</b>   |
| 113    | Diagnosis and pharmacological management of Parkinson's disease                                                        | 61    | 12                   | 6  | 6  | 4  | <b>28</b>  |
| 112    | Management of attention deficit and hyperkinetic disorders in children and young people                                | 45    | 6                    | 4  | 3  | 4  | <b>17</b>  |
| 111    | Management of hip fracture in old people                                                                               | 49    | 10                   | 9  | 8  | 14 | <b>41</b>  |
| 110    | Early management of patients with a head injury                                                                        | 76    | 1                    | 7  | 6  | 17 | <b>31</b>  |
| 109    | Management of genital Chlamydia trachomatis infection                                                                  | 40    | 3                    | 6  | 9  | 29 | <b>47</b>  |
| 108    | Management of patients with stroke or TIA: assessment, investigation, immediate management and secondary prevention    | 100   | 42                   | 27 | 18 | 14 | <b>101</b> |
| 107    | Diagnosis and management of headache in adults                                                                         | 81    | 17                   | 16 | 9  | 34 | <b>76</b>  |
| 106    | Control of pain in adults with cancer                                                                                  | 71    | 5                    | 7  | 3  | 19 | <b>34</b>  |
| 105    | Management of acute upper and lower gastrointestinal bleeding                                                          | 57    | 14                   | 5  | 2  | 15 | <b>36</b>  |
| 103    | Diagnosis and management of chronic kidney disease                                                                     | 50    | 9                    | 6  | 4  | 3  | <b>22</b>  |
| 102    | Management of invasive meningococcal disease in children and young people                                              | 46    | 1                    | 4  | 6  | 26 | <b>37</b>  |
| 99     | Management of cervical cancer                                                                                          | 73    | 1                    | 13 | 19 | 29 | <b>62</b>  |
| 97     | Risk estimation and the prevention of cardiovascular disease                                                           | 72    | 16                   | 12 | 2  | 4  | <b>34</b>  |

|              |                                                                     |             |            |            |            |            |             |
|--------------|---------------------------------------------------------------------|-------------|------------|------------|------------|------------|-------------|
| 96           | Management of stable angina                                         | 59          | 13         | 10         | 3          | 11         | <b>37</b>   |
| 95           | Management of chronic heart failure                                 | 55          | 9          | 12         | 1          | 1          | <b>23</b>   |
| 94           | Cardiac arrhythmias and coronary heart disease                      | 42          | 22         | 11         | 13         | 23         | <b>69</b>   |
| 93           | Acute coronary syndromes                                            | 60          | 11         | 14         | 9          | 8          | <b>42</b>   |
| 91           | Bronchiolitis in children                                           | 42          | 4          | 3          | 6          | 14         | <b>27</b>   |
| 90           | Diagnosis and management of head and neck cancer                    | 92          | 42         | 8          | 26         | 60         | <b>136</b>  |
| 89           | Diagnosis and management of peripheral arterial disease             | 37          | 11         | 2          | 0          | 4          | <b>17</b>   |
| 88           | Management of suspected bacterial urinary tract infection in adults | 45          | 8          | 10         | 2          | 10         | <b>30</b>   |
| 87           | Management of oesophageal and gastric cancer                        | 70          | 3          | 26         | 23         | 28         | <b>80</b>   |
| 61           | Investigation of postmenopausal bleeding                            | 26          | 2          | 7          | 4          | 4          | <b>17</b>   |
| <b>TOTAL</b> |                                                                     | <b>2559</b> | <b>480</b> | <b>491</b> | <b>318</b> | <b>710</b> | <b>1999</b> |

[27 GRADE working group http://www.gradeworkinggroup.org/about\\_us.htm](http://www.gradeworkinggroup.org/about_us.htm)

[28 Harbour R, Miller J. A new system for grading recommendations in evidence based guidelines. BMJ. 2001 Aug 11;323\(7308\):334-6.](#)

Table 1

|          |                                                                                                                                                                                                                                                                                              |
|----------|----------------------------------------------------------------------------------------------------------------------------------------------------------------------------------------------------------------------------------------------------------------------------------------------|
| <b>A</b> | At least one meta-analysis, systematic review, or RCT rated as 1++, and directly applicable to the target population; or<br>A body of evidence consisting principally of studies rated as 1+, directly applicable to the target population, and demonstrating overall consistency of results |
| <b>B</b> | A body of evidence including studies rated as 2++, directly applicable to the target population, and demonstrating overall consistency of results; or<br>Extrapolated evidence from studies rated as 1++ or 1+                                                                               |
| <b>C</b> | A body of evidence including studies rated as 2+, directly applicable to the target population and demonstrating overall consistency of results; or<br>Extrapolated evidence from studies rated as 2++                                                                                       |
| <b>D</b> | Evidence level 3 or 4; or<br>Extrapolated evidence from studies rated as 2+                                                                                                                                                                                                                  |

Table 2

|    |                                                                                                                                                          |
|----|----------------------------------------------------------------------------------------------------------------------------------------------------------|
| 1  |                                                                                                                                                          |
| 2  |                                                                                                                                                          |
| 3  |                                                                                                                                                          |
| 4  |                                                                                                                                                          |
| 5  |                                                                                                                                                          |
| 6  |                                                                                                                                                          |
| 7  |                                                                                                                                                          |
| 8  |                                                                                                                                                          |
| 9  | <b>1++</b> High quality meta-analyses, systematic reviews of RCTs, or RCTs with a very low risk of bias                                                  |
| 10 |                                                                                                                                                          |
| 11 |                                                                                                                                                          |
| 12 | <b>1+</b> Well conducted meta-analyses, systematic reviews, or RCTs with a low risk of bias                                                              |
| 13 |                                                                                                                                                          |
| 14 |                                                                                                                                                          |
| 15 |                                                                                                                                                          |
| 16 | <b>1 -</b> -Meta-analyses, systematic reviews, or RCTs with a high risk of bias                                                                          |
| 17 |                                                                                                                                                          |
| 18 | <b>2++</b> High quality systematic reviews of case control or cohort studies                                                                             |
| 19 |                                                                                                                                                          |
| 20 | <b>2+</b> High quality case control or cohort studies with a very low risk of confounding or bias and a high probability that the relationship is causal |
| 21 |                                                                                                                                                          |
| 22 |                                                                                                                                                          |
| 23 | <b>2 -</b> Case control or cohort studies with a high risk of confounding or bias and a significant risk that the relationship is not causal             |
| 24 |                                                                                                                                                          |
| 25 |                                                                                                                                                          |
| 26 |                                                                                                                                                          |
| 27 | <b>3</b> Non-analytic studies, eg case reports, case series                                                                                              |
| 28 |                                                                                                                                                          |
| 29 | <b>4</b> Expert opinion                                                                                                                                  |
| 30 |                                                                                                                                                          |
| 31 |                                                                                                                                                          |
| 32 |                                                                                                                                                          |
| 33 |                                                                                                                                                          |
| 34 |                                                                                                                                                          |
| 35 |                                                                                                                                                          |
| 36 |                                                                                                                                                          |
| 37 |                                                                                                                                                          |
| 38 |                                                                                                                                                          |
| 39 |                                                                                                                                                          |
| 40 |                                                                                                                                                          |
| 41 |                                                                                                                                                          |
| 42 |                                                                                                                                                          |
| 43 |                                                                                                                                                          |
| 44 |                                                                                                                                                          |
| 45 |                                                                                                                                                          |
| 46 |                                                                                                                                                          |
| 47 |                                                                                                                                                          |
| 48 |                                                                                                                                                          |
| 49 |                                                                                                                                                          |
| 50 |                                                                                                                                                          |
| 51 |                                                                                                                                                          |
| 52 |                                                                                                                                                          |
| 53 |                                                                                                                                                          |
| 54 |                                                                                                                                                          |
| 55 |                                                                                                                                                          |
| 56 |                                                                                                                                                          |
| 57 |                                                                                                                                                          |
| 58 |                                                                                                                                                          |
| 59 |                                                                                                                                                          |
| 60 |                                                                                                                                                          |



Table 3 – for editing

| Number | Number | Name                                                                                                                   | Pages | Main Recommendations |    |    |    | Total      | %age<br>D |
|--------|--------|------------------------------------------------------------------------------------------------------------------------|-------|----------------------|----|----|----|------------|-----------|
|        |        |                                                                                                                        |       | A                    | B  | C  | D  |            |           |
| 133    | 133    | Management of hepatitis C                                                                                              | 57    | 20                   | 24 | 7  | 52 | <b>103</b> | 50.5%     |
| 132    | 132    | Long-term follow-up of survivors of childhood cancer                                                                   | 62    | 0                    | 7  | 9  | 14 | <b>30</b>  | 46.7%     |
| 131    | 131    | Management of schizophrenia                                                                                            | 64    | 10                   | 19 | 3  | 15 | <b>47</b>  | 31.9%     |
| 130    | 130    | Brain injury rehabilitation in adults                                                                                  | 68    | 0                    | 14 | 7  | 8  | <b>29</b>  | 27.6%     |
| 129    | 129    | Antithrombotics: indication and management                                                                             | 68    | 25                   | 11 | 6  | 19 | <b>61</b>  | 31.1%     |
| 127    | 127    | Management of perinatal mood disorders                                                                                 | 47    | 0                    | 5  | 6  | 15 | <b>26</b>  | 57.7%     |
| 126    | 126    | Diagnosis and management of colorectal cancer                                                                          | 56    | 11                   | 19 | 15 | 29 | <b>74</b>  | 39.2%     |
| 125    | 125    | Management of atopic eczema in primary care                                                                            | 34    | 3                    | 5  | 3  | 2  | <b>13</b>  | 15.4%     |
| 124    | 124    | Management of adult testicular germ cell tumours                                                                       | 63    | 6                    | 6  | 9  | 21 | <b>42</b>  | 50.0%     |
| 123    | 123    | Management of early rheumatoid arthritis                                                                               | 27    | 3                    | 7  | 2  | 0  | <b>12</b>  | 0.0%      |
| 122    | 122    | Prevention and management of venous thromboembolism                                                                    | 88    | 26                   | 15 | 14 | 55 | <b>110</b> | 50.0%     |
| 121    | 121    | Diagnosis and management of psoriasis and psoriatic arthritis in adults                                                | 65    | 11                   | 16 | 6  | 26 | <b>59</b>  | 44.1%     |
| 120    | 120    | Management of chronic venous leg ulcers                                                                                | 46    | 5                    | 3  | 4  | 7  | <b>19</b>  | 36.8%     |
| 119    | 119    | Management of patients with stroke: identification and management of dysphagia                                         | 42    | 0                    | 6  | 4  | 20 | <b>30</b>  | 66.7%     |
| 118    | 118    | Management of patients with stroke: rehabilitation, prevention and management of complications, and discharge planning | 101   | 21                   | 29 | 7  | 21 | <b>78</b>  | 26.9%     |
| 117    | 117    | Management of sore throat and indications for tonsillectomy                                                            | 37    | 9                    | 3  | 4  | 4  | <b>20</b>  | 20.0%     |
| 116    | 116    | Management of diabetes                                                                                                 | 161   | 57                   | 62 | 23 | 16 | <b>158</b> | 10.1%     |
| 115    | 115    | Management of Obesity                                                                                                  | 87    | 6                    | 11 | 7  | 11 | <b>35</b>  | 31.4%     |
| 114    | 114    | Nonpharmaceutical management of depression                                                                             | 37    | 5                    | 4  | 0  | 0  | <b>9</b>   | 0.0%      |

Table 3 – for editing

|     |     |                                                                                                                     |     |    |    |    |    |            |       |
|-----|-----|---------------------------------------------------------------------------------------------------------------------|-----|----|----|----|----|------------|-------|
| 113 | 113 | Diagnosis and pharmacological management of Parkinson's disease                                                     | 61  | 12 | 6  | 6  | 4  | <b>28</b>  | 14.3% |
| 112 | 112 | Management of attention deficit and hyperkinetic disorders in children and young people                             | 45  | 6  | 4  | 3  | 4  | <b>17</b>  | 23.5% |
| 111 | 111 | Management of hip fracture in old people                                                                            | 49  | 10 | 9  | 8  | 14 | <b>41</b>  | 34.1% |
| 110 | 110 | Early management of patients with a head injury                                                                     | 76  | 1  | 7  | 6  | 17 | <b>31</b>  | 54.8% |
| 109 | 109 | Management of genital Chlamydia trachomatis infection                                                               | 40  | 3  | 6  | 9  | 29 | <b>47</b>  | 61.7% |
| 108 | 108 | Management of patients with stroke or TIA: assessment, investigation, immediate management and secondary prevention | 100 | 42 | 27 | 18 | 14 | <b>101</b> | 13.9% |
| 107 | 107 | Diagnosis and management of headache in adults                                                                      | 81  | 17 | 16 | 9  | 34 | <b>76</b>  | 44.7% |
| 106 | 106 | Control of pain in adults with cancer                                                                               | 71  | 5  | 7  | 3  | 19 | <b>34</b>  | 55.9% |
| 105 | 105 | Management of acute upper and lower gastrointestinal bleeding                                                       | 57  | 14 | 5  | 2  | 15 | <b>36</b>  | 41.7% |
| 103 | 103 | Diagnosis and management of chronic kidney disease                                                                  | 50  | 9  | 6  | 4  | 3  | <b>22</b>  | 13.6% |
| 102 | 102 | Management of invasive meningococcal disease in children and young people                                           | 46  | 1  | 4  | 6  | 26 | <b>37</b>  | 70.3% |
| 99  | 99  | Management of cervical cancer                                                                                       | 73  | 1  | 13 | 19 | 29 | <b>62</b>  | 46.8% |
| 97  | 97  | Risk estimation and the prevention of cardiovascular disease                                                        | 72  | 16 | 12 | 2  | 4  | <b>34</b>  | 11.8% |
| 96  | 96  | Management of stable angina                                                                                         | 59  | 13 | 10 | 3  | 11 | <b>37</b>  | 29.7% |
| 95  | 95  | Management of chronic heart failure                                                                                 | 55  | 9  | 12 | 1  | 1  | <b>23</b>  | 4.3%  |
| 94  | 94  | Cardiac arrhythmias and coronary heart disease                                                                      | 42  | 22 | 11 | 13 | 23 | <b>69</b>  | 33.3% |
| 93  | 93  | Acute coronary syndromes                                                                                            | 60  | 11 | 14 | 9  | 8  | <b>42</b>  | 19.0% |
| 91  | 91  | Bronchiolitis in children                                                                                           | 42  | 4  | 3  | 6  | 14 | <b>27</b>  | 51.9% |
| 90  | 90  | Diagnosis and management of head and neck cancer                                                                    | 92  | 42 | 8  | 26 | 60 | <b>136</b> | 44.1% |
| 89  | 89  | Diagnosis and management of peripheral arterial disease                                                             | 37  | 11 | 2  | 0  | 4  | <b>17</b>  | 23.5% |
| 88  | 88  | Management of suspected bacterial urinary tract infection in adults                                                 | 45  | 8  | 10 | 2  | 10 | <b>30</b>  | 33.3% |

Table 3 – for editing

|              |    |                                              |             |            |            |            |            |             |       |
|--------------|----|----------------------------------------------|-------------|------------|------------|------------|------------|-------------|-------|
| 87           | 87 | Management of oesophageal and gastric cancer | 70          | 3          | 26         | 23         | 28         | <b>80</b>   | 35.0% |
| 61           | 61 | Investigation of postmenopausal bleeding     | 26          | 2          | 7          | 4          | 4          | <b>17</b>   | 23.5% |
| <u>TOTAL</u> |    |                                              | <u>2559</u> | <u>480</u> | <u>491</u> | <u>318</u> | <u>710</u> | <u>1999</u> |       |

For peer review only

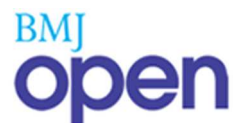

**Scottish Intercollegiate Guideline Network—analysis of evidence levels for their recommendations.**

|                                 |                                                                                                                                                                                                                                                            |
|---------------------------------|------------------------------------------------------------------------------------------------------------------------------------------------------------------------------------------------------------------------------------------------------------|
| Journal:                        | <i>BMJ Open</i>                                                                                                                                                                                                                                            |
| Manuscript ID:                  | bmjopen-2013-004278.R2                                                                                                                                                                                                                                     |
| Article Type:                   | Research                                                                                                                                                                                                                                                   |
| Date Submitted by the Author:   | 13-Jan-2014                                                                                                                                                                                                                                                |
| Complete List of Authors:       | Baird, Alastair; The White House, Lawrence, James; Dumfries & Galloway Royal Infirmary, Research & Development Support Unit                                                                                                                                |
| <b>Primary Subject Heading</b>: | Evidence based practice                                                                                                                                                                                                                                    |
| Secondary Subject Heading:      | General practice / Family practice                                                                                                                                                                                                                         |
| Keywords:                       | HEALTH SERVICES ADMINISTRATION & MANAGEMENT, Protocols & guidelines < HEALTH SERVICES ADMINISTRATION & MANAGEMENT, Quality in health care < HEALTH SERVICES ADMINISTRATION & MANAGEMENT, Clinical governance < HEALTH SERVICES ADMINISTRATION & MANAGEMENT |
|                                 |                                                                                                                                                                                                                                                            |

SCHOLARONE™  
Manuscripts

1  
2  
3  
4  
5 **Scottish Intercollegiate Guideline Network—analysis of**  
6 **evidence levels for their recommendations.**  
7  
8

9 *Alternatively*

10  
11  
12 **Guideline recommendations are more better? A review of**  
13 **Scottish Intercollegiate Guideline Network national**  
14 **guidelines.**  
15  
16  
17  
18  
19

20 Dr A Gordon Baird, MB ChB MRCOG FRCGP R&D General  
21 Practice Adviser, Research and Development Support Unit,  
22 Dumfries and Galloway Royal infirmary, Bankend Road,  
23 Dumfries, Scotland, UK DG1 4AP.  
24  
25  
26  
27

28 Address for correspondence; Dr A Gordon Baird, The White  
29 House, Sandhead, Wigtownshire UK. DG9 9JA. Email  
30 [gordon.baird@me.com](mailto:gordon.baird@me.com). Phone/fax 01776830281  
31  
32  
33

34 Dr James R Lawrence, BSc MD FRCP(Glas & Edin) R&D Clinical  
35 Lead, Research and Development Support Unit, Dumfries and  
36 Galloway Royal infirmary, Bankend Road, Dumfries, Scotland,  
37 UK DG1 4AP.  
38  
39  
40  
41

42 MeSH headings

43 General practice / Family practice

44 HEALTH SERVICES ADMINISTRATION & MANAGEMENT

45 Protocols & guidelines

46 Quality in health care

47 Clinical governance  
48  
49  
50  
51  
52  
53  
54  
55  
56  
57  
58  
59  
60

## **ABSTRACT**

### **Background**

National guidelines have become an integral part of UK general practice and aim to effectively deliver quality and consistency in clinical practice. As with any intervention, there are negative as well as positive consequences. Guideline effectiveness depends on the quality of evidence used.

### **Aim**

To quantify and analyse the quality of evidence that is presented in national guidelines.

### **Design and setting**

Levels of evidence used in all the current valid recommendations in the Scottish Intercollegiate Guideline Network (SIGN) guidelines were reviewed and statistically analysed.

### **Method**

The data was collected from published guidelines available online to the public. SIGN methodology entails a professional group selected by a national organisation to develop each of these guidelines. Statistical analysis of the relationship between the number of guideline recommendations and the quality of evidence used in its recommendations was performed.

### **Result**

A significant correlation between the number of recommendations in a guideline and the use of level D evidence was discovered.

### **Conclusion**

Practice guidelines should be brief and based on scientific evidence. Paradoxically the longest guidelines have the highest proportion of recommendations based on the lowest level of evidence. Guideline developers should be more aware of the need for brevity and a stricter application of evidence-based principles could achieve this. The findings support calls for a review of how evidence is used and presented in guidelines.

## Article Summary

### **Article focus**

Examines the hypothesis that larger guidelines rely disproportionately on poor evidence.

### **Key Messages**

- One third of current national guidelines are supported only by case reports, case studies and expert opinion.
- Guidelines with large numbers of recommendations used a higher proportion of weak evidence.
- Guideline development groups appear to vary in their approach to offering recommendations.
- Guideline recommendations should be based on good evidence.
- Paucity of evidence should highlight topics for research.

### **Strengths and limitations of the study**

#### Strengths.

- This is the first objective evidence of inconsistencies in approach by a national guideline developer
- This supports commentator suggestion that even without good evidence a group will prefer consensus.
- Adds to the current debate about how guidelines might be developed in the future

#### Limitations.

- The study is limited to only one set of national guidelines (SIGN).
- Reasons for the differences in quality of evidence preferred by the guideline development groups is unclear

## **Guidelines – is bigger better? A review of SIGN guidelines.**

### INTRODUCTION

The Scottish Intercollegiate Guidelines Network (SIGN) was founded in 1993. It is a national body, professionally led and publicly funded. SIGN's founding principles proposed direct links between evidence and recommendations, offering a brief and succinct quick-reference guide for clinicians [1]. Guidelines anticipated presenting brief, evidence based clinical advice. They have developed into long and authoritative texts used by managers and politicians to inform policy. A formal arrangement between SIGN and the National Institute of Clinical Excellence (NICE) has existed from 2003. Both have responsibility to consider cost-effectiveness and input to the Quality Outcomes Framework (QOF).

The World Health Organisation (WHO) recognises that current grades of recommendation (Table 1) may be ambiguous[2] and encourages guideline developers to use a system which includes a category "Use only in the context of research" where doubt exists.

Guideline developers have conflict of interest policies reported as challenging to apply. Where doubt exists, groups of specialists may feel consensus more defensible than acknowledging uncertainty. [3]

Even with the best evidence, concerns are expressed about the relevance of guidelines in treating patients with multiple morbidities[4], and the emergence of the phenomenon of reversal[5,6], where established practice, sometimes evidence based, is shown to be sub-optimal or harmful. This study looks at the quality of evidence used for SIGN guidelines, and describes a significant trend for some groups to emphasise poorly evidence-backed recommendations.

### METHODS



1  
2  
3 SIGN guidelines were accessed online in September 2013. SIGN guidelines were  
4 chosen because they are internationally respected, the authors were familiar with  
5 their format and they contribute to national government policy. Guidelines that  
6 were "Current" and "Current 3-7 years". Some recommendations may be out of  
7 date." were included. Those that had been "Withdrawn", "Recommendations being  
8 updated", "Need for update being considered" and those with no recommendations  
9 were excluded.

10  
11  
12  
13  
14  
15  
16  
17 SIGN guideline 50 clearly describes an established process for developing  
18 guidelines.[7] It explains how the process is planned, how it is implemented and by  
19 whom. This process is independent of this study, but is stated to be an objective  
20 process. SIGN guidelines have four grades of recommendation outlined in table 1.  
21 Table 2 describes the level of evidence SIGN uses to support the recommendation  
22 grading. SIGN guideline development groups vary in size depending on the scope of  
23 the topic under consideration, but generally comprise between 15 and 25 members.  
24 SIGN states they are aware of the many psychosocial factors, including the problems  
25 of overcoming professional hierarchies that can affect small group processes.

26  
27  
28  
29  
30  
31  
32  
33  
34  
35 3 investigators (JRL, AGB, ABB) independently enumerated the level of evidence  
36 used by each guideline. They discounted any duplication implicit in text-embedded  
37 key recommendations and also implementation recommendations. There were no  
38 discrepancies. A statistical analysis of the correlation between the proportion of  
39 level D evidence and the total number of recommendations was performed for the  
40 42 guidelines.

## 41 42 43 44 45 46 47 RESULTS

48  
49 The 42 guidelines consisted of 2559 pages (including references), ranging from 26 to  
50 161 (median 59.5) pages. The longest guideline, number 116 was 61 pages longer  
51 than the next largest. The number of recommendations per page ranged from 0.2 to  
52 1.8 (median 0.7). The number of recommendations per guideline is presented in  
53 table 3.  
54  
55  
56  
57  
58  
59  
60

1  
2  
3 Of the 1999 recommendations, 480 (24.0%) were level A, 491(24.6 %) were level B,  
4 318 (15.9%) level C, and 710 (35.5%) level D. Thus 51.4% were poorly evidenced  
5 (C&D) and over a third (D) developed almost entirely on “expert opinion”. The  
6 number of level A recommendations per guideline ranged from 0-57 (median 9),  
7 level B from 2-62 (median 8.5) level C ranged from 0-26 (median 6) and D from 0-60  
8 (median 14.5). 4 guidelines had no level A evidence.  
9

10  
11  
12  
13  
14  
15  
16 The proportion of level D evidence increases with the number of recommendations  
17 made. This correlation is significant with Kendall’s Tau=0.22 [approximate 95%  
18 confidence interval 0.008-0.45] p value =0.04, and Spearman rho=0.22 [approximate  
19 95% CI 0.02-0.57] p value= .04.  
20  
21  
22

## 23 24 DISCUSSION

25  
26 This study reveals that expert groups who produce long guidelines rely on poor  
27 evidence more heavily than others. While this study only looks at SIGN, this study  
28 highlights a problem that has escaped national guideline developers, a wide range of  
29 professionals and the public to whom these guidelines are applied. National  
30 guidelines are useful and important and there is a debate about how evidence is  
31 best presented. Guidelines define standards of care, help busy clinicians and allow  
32 managers and politicians to develop governance. An American study (using 3 not 4  
33 levels of evidence) similarly found that 48% were “based on expert opinion, case  
34 studies, or standards of care.” [8]; we show comparable results for current SIGN  
35 guidelines. Where patients are involved in clinical decisions, honestly declaring  
36 uncertainty has merit. In the absence of good scientific evidence, recommending a  
37 course of action without understanding the circumstances of the individual to whom  
38 it is applied seems both risky and, assuming a right to patient choice, unwarranted.  
39 Other guidelines that use high levels of poor evidence should evaluate the  
40 proportion of poorly evidenced recommendations and seek explanations for such  
41 trends.  
42  
43  
44  
45  
46  
47  
48  
49  
50  
51  
52  
53

54  
55  
56 This study did not examine why longer guidelines use poorer evidence. Groups of  
57 experts, indulging in “group think” may view their own opinion as more authoritative  
58  
59  
60

1  
2  
3 than science can support[9]. It has been postulated that there is security in “just  
4 doing what everyone else is doing – even if what everyone else is doing isn’t very  
5 good.”[3] Reliance on expert opinion has a poor track record. Blinded by certainty,  
6 expert groups defining established practice have, in the past, perpetuated radical  
7 mastectomy instead of conservative surgery, Class 1C antiarrhythmics[10],  
8 pulmonary artery catheters in heart failure[11], electronic foetal monitoring in low  
9 risk pregnancies: even then practice can take a decade to reverse[12].

16  
17 Even good evidence is subject to the phenomenon of reversal where new evidence  
18 contradicts current practice. Reversal can affect around 13-16% of publications [5,6].  
19 This may partly explain why the implementation of even the most soundly evidence  
20 based national guidelines fails to improve outcome [13-15] . There is potential  
21 harm[16,17] from guidelines in real clinical settings, for example increasing radiation  
22 dose without benefit[18] or increased risks of anticoagulation[19].

28  
29 SIGN 116 (diabetes), is a notable exception. It is more than 50% larger than the next  
30 largest, 2.5 times longer than the average and yet uses the 4<sup>th</sup> lowest level D  
31 recommendations. There are a number of hypotheses why this group reports  
32 differently. SIGN guidelines inform Quality Outcomes Framework (QOF) policy.  
33 Diabetes is the largest clinical UK QOF indicator and is associated with substantial  
34 payment incentives. The need for objective evaluation of performance drives a use  
35 of surrogate outcomes without appropriate clinical endpoints. [20] Diabetes  
36 guidelines have suffered several noteworthy reversals. Examples include the  
37 recommendation of glycosylated haemoglobin reduction resulting in increased use  
38 of rosiglitazone (still mentioned in the current document) both associated with harm  
39 including mortality. [21,22] Aspirin recommendations have also been changed from  
40 previous guidelines. Is it possible that the repeated use of surrogate outcomes arises  
41 from group dynamics driven by a powerful external agenda?

52  
53  
54 Many doctors whose expertise cross several guidelines[23,24] express concerns  
55 about guideline development groups. The inappropriate exclusion of disease groups  
56 from general population data is common. Smoking cessation advice for testicular  
57  
58  
59  
60

1  
2  
3 cancer survivors is level C, although studies in the general population (without  
4 excepting specific disease groups) advises everyone to stop smoking. Overall  
5 smoking cessation was level D and C once each and B on three occasions. Using  
6 evidence in this way may imply group dysfunction. Differently constituted groups, or  
7 greater oversight might avoid problems.  
8  
9  
10

11  
12  
13 In 1993, SIGN guidelines stated intention was to be evidence based, brief and  
14 succinct. Brevity increases value as a quick reference guide. Removing or reducing  
15 poorly evidenced recommendations would reduce size by more than a third overall  
16 and in some up to two thirds. The two volumes Oxford Textbook of Primary Medical  
17 Care (2005) is a relatively brief 1420 pages, more than a thousand less than the 2559  
18 pages of guidelines. Evidence based medicine is described as “the use of  
19 mathematical estimates of the risk of benefit and harm, derived from high-quality  
20 research on population samples, to inform clinical decision-making in the diagnosis,  
21 investigation or management of individual patients”[25]. Guidelines relevance to  
22 daily practice, the reliability of evidence and whether the application of evidence will  
23 improve outcomes are important questions.  
24  
25  
26  
27  
28  
29  
30  
31  
32

33  
34  
35 These results may reflect how professional groups deal with uncertainty. If so, this is  
36 not good for individual patients faced with the same uncertainties (whether aware  
37 of it or not), nor is it good for scientists who actively seek unanswered questions by  
38 challenging established practice, an area in which medicine has a poor record from  
39 Semmelweis to the present day.  
40  
41  
42  
43  
44

45  
46 The finding of a significant increase of level D recommendations in larger guidelines  
47 has not happened by chance. A wider debate about how guideline groups can create  
48 greater clarity about the reliability of evidence used is needed.[26] Reducing the use  
49 of poorly evidenced recommendations has potential to create a shorter, more  
50 reliable and usable clinical support. The GRADE working group was formed in  
51 2000.[27] SIGN moved to a new grading system in 2001[28] and from 2013 a new  
52 system based on GRADE principles. Whether these changes will resolve the  
53 challenges that underpin the inconsistencies we have outlined remains to be seen.  
54  
55  
56  
57  
58  
59  
60

The authors would like to acknowledge the help of Heather Barrington, Dumfries & Galloway Royal Infirmary, Research & Development Support Unit Dumfries, Dumfries & Galloway, United Kingdom who gave statistical advice and support, and Anne B Baird, The white House, Sandhead, Wigtownshire DG9 9JA who checked the data for inconsistencies.

Table 1

| GRADES OF RECOMMENDATION |                                                                                                                                                                                                                                                                                           |
|--------------------------|-------------------------------------------------------------------------------------------------------------------------------------------------------------------------------------------------------------------------------------------------------------------------------------------|
| <b>A</b>                 | At least one meta-analysis, systematic review, or RCT rated as 1++, and directly applicable to the target population; or A body of evidence consisting principally of studies rated as 1+, directly applicable to the target population, and demonstrating overall consistency of results |
| <b>B</b>                 | A body of evidence including studies rated as 2++, directly applicable to the target population and demonstrating overall consistency of results; or Extrapolated evidence from studies rated as 1++ or 1+                                                                                |
| <b>C</b>                 | A body of evidence including studies rated as 2+, directly applicable to the target population and demonstrating overall consistency of results; or Extrapolated evidence from studies rated as 2++                                                                                       |
| <b>D</b>                 | Evidence level 3 or 4; or Extrapolated evidence from studies rated as 2+                                                                                                                                                                                                                  |

Table 2

|            |                                                                                                                                                |
|------------|------------------------------------------------------------------------------------------------------------------------------------------------|
| <b>1++</b> | High quality meta-analyses, systematic reviews of RCTs, or RCTs with a very low risk of bias                                                   |
| <b>1+</b>  | Well conducted meta-analyses, systematic reviews, or RCTs with a low risk of bias                                                              |
| <b>1 -</b> | -Meta-analyses, systematic reviews, or RCTs with a high risk of bias                                                                           |
| <b>2++</b> | High quality systematic reviews of case control or cohort studies                                                                              |
| <b>2+</b>  | High quality case control or cohort studies with a very low risk of confounding or bias and a high probability that the relationship is causal |
| <b>2 -</b> | Case control or cohort studies with a high risk of confounding or bias and a significant risk that the relationship is not causal              |
| <b>3</b>   | Non-analytic studies, eg case reports, case series                                                                                             |

|   |                |
|---|----------------|
| 4 | Expert opinion |
|---|----------------|

Table 3

Main Recommendations

For peer review only

| Number | Name                                                                                                                   | Pages        | A           | B          | C          | D          | Total      | %age D      |
|--------|------------------------------------------------------------------------------------------------------------------------|--------------|-------------|------------|------------|------------|------------|-------------|
| 133    | Management of hepatitis C                                                                                              | 57           | 20          | 24         | 7          | 52         | <b>103</b> | 50.5%       |
| 132    | Long-term follow-up of survivors of childhood cancer                                                                   | 62           | 0           | 7          | 9          | 14         | <b>30</b>  | 46.7%       |
| 131    | Management of schizophrenia                                                                                            | 64           | 10          | 19         | 3          | 15         | <b>47</b>  | 31.9%       |
| 130    | Brain injury rehabilitation in adults                                                                                  | 68           | 0           | 14         | 7          | 8          | <b>29</b>  | 27.6%       |
| 129    | Antithrombotics: indication and management                                                                             | 68           | 25          | 11         | 6          | 19         | <b>61</b>  | 31.1%       |
| 127    | Management of perinatal mood disorders                                                                                 | 47           | 0           | 5          | 6          | 15         | <b>26</b>  | 57.7%       |
| 126    | Diagnosis and management of colorectal cancer                                                                          | 56           | 11          | 19         | 15         | 29         | <b>74</b>  | 39.2%       |
| 125    | Management of atopic eczema in primary care                                                                            | 34           | 3           | 5          | 3          | 2          | <b>13</b>  | 15.4%       |
| 124    | Management of adult testicular germ cell tumours                                                                       | 63           | 6           | 6          | 9          | 21         | <b>42</b>  | 50.0%       |
| 123    | Management of early rheumatoid arthritis                                                                               | 27           | 3           | 7          | 2          | 0          | <b>12</b>  | 0.0%        |
| 122    | Prevention and management of venous thromboembolism                                                                    | 88           | 26          | 15         | 14         | 55         | <b>110</b> | 50.0%       |
| 121    | Diagnosis and management of psoriasis and psoriatic arthritis in adults                                                | 65           | 11          | 16         | 6          | 26         | <b>59</b>  | 44.1%       |
| 120    | Management of chronic venous leg ulcers                                                                                | 46           | 5           | 3          | 4          | 7          | <b>19</b>  | 36.8%       |
| 119    | Management of patients with stroke: identification and management of dysphagia                                         | 42           | 0           | 6          | 4          | 20         | <b>30</b>  | 66.7%       |
| 118    | Management of patients with stroke: rehabilitation, prevention and management of complications, and discharge planning | 101          | 21          | 29         | 7          | 21         | <b>78</b>  | 26.9%       |
| 117    | Management of sore throat and indications for tonsillectomy                                                            | 37           | 9           | 3          | 4          | 4          | <b>20</b>  | 20.0%       |
| 116    | Management of diabetes                                                                                                 | 161          | 57          | 62         | 23         | 16         | <b>158</b> | 10.1%       |
| 115    | Management of Obesity                                                                                                  | 87           | 6           | 11         | 7          | 11         | <b>35</b>  | 31.4%       |
| 114    | Nonpharmaceutical management of depression                                                                             | 37           | 5           | 4          | 0          | 0          | <b>9</b>   | 0.0%        |
| 113    | Diagnosis and pharmacological management of Parkinson's disease                                                        | 61           | 12          | 6          | 6          | 4          | <b>28</b>  | 14.3%       |
| 112    | Management of attention deficit and hyperkinetic disorders in children and young people                                | 45           | 6           | 4          | 3          | 4          | <b>17</b>  | 23.5%       |
| 111    | Management of hip fracture in old people                                                                               | 49           | 10          | 9          | 8          | 14         | <b>41</b>  | 34.1%       |
| 110    | Early management of patients with a head injury                                                                        | 76           | 1           | 7          | 6          | 17         | <b>31</b>  | 54.8%       |
| 109    | Management of genital Chlamydia trachomatis infection                                                                  | 40           | 3           | 6          | 9          | 29         | <b>47</b>  | 61.7%       |
| 108    | Management of patients with stroke or TIA: assessment, investigation, immediate management and secondary prevention    | 100          | 42          | 27         | 18         | 14         | <b>101</b> | 13.9%       |
| 107    | Diagnosis and management of headache in adults                                                                         | 81           | 17          | 16         | 9          | 34         | <b>76</b>  | 44.7%       |
| 106    | Control of pain in adults with cancer                                                                                  | 71           | 5           | 7          | 3          | 19         | <b>34</b>  | 55.9%       |
| 105    | Management of acute upper and lower gastrointestinal bleeding                                                          | 57           | 14          | 5          | 2          | 15         | <b>36</b>  | 41.7%       |
| 103    | Diagnosis and management of chronic kidney disease                                                                     | 50           | 9           | 6          | 4          | 3          | <b>22</b>  | 13.6%       |
| 102    | Management of invasive meningococcal disease in children and young people                                              | 46           | 1           | 4          | 6          | 26         | <b>37</b>  | 70.3%       |
| 99     | Management of cervical cancer                                                                                          | 73           | 1           | 13         | 19         | 29         | <b>62</b>  | 46.8%       |
| 97     | Risk estimation and the prevention of cardiovascular disease                                                           | 72           | 16          | 12         | 2          | 4          | <b>34</b>  | 11.8%       |
| 96     | Management of stable angina                                                                                            | 59           | 13          | 10         | 3          | 11         | <b>37</b>  | 29.7%       |
| 95     | Management of chronic heart failure                                                                                    | 55           | 9           | 12         | 1          | 1          | <b>23</b>  | 4.3%        |
| 94     | Cardiac arrhythmias and coronary heart disease                                                                         | 42           | 22          | 11         | 13         | 23         | <b>69</b>  | 33.3%       |
| 93     | Acute coronary syndromes                                                                                               | 60           | 11          | 14         | 9          | 8          | <b>42</b>  | 19.0%       |
| 91     | Bronchiolitis in children                                                                                              | 42           | 4           | 3          | 6          | 14         | <b>27</b>  | 51.9%       |
| 90     | Diagnosis and management of head and neck cancer                                                                       | 92           | 42          | 8          | 26         | 60         | <b>136</b> | 44.1%       |
| 89     | Diagnosis and management of peripheral arterial disease                                                                | 37           | 11          | 2          | 0          | 4          | <b>17</b>  | 23.5%       |
| 88     | Management of suspected bacterial urinary tract infection in adults                                                    | 45           | 8           | 10         | 2          | 10         | <b>30</b>  | 33.3%       |
| 87     | Management of oesophageal and gastric cancer                                                                           | 70           | 3           | 26         | 23         | 28         | <b>80</b>  | 35.0%       |
| 61     | Investigation of postmenopausal bleeding                                                                               | 26           | 2           | 7          | 4          | 4          | <b>17</b>  | 23.5%       |
|        |                                                                                                                        | <b>TOTAL</b> | <b>2559</b> | <b>480</b> | <b>491</b> | <b>318</b> | <b>710</b> | <b>1999</b> |

### **Acknowledgements.**

Heather Barrington, Statistical Adviser; Bridget Bird, Administrative Assistant; Research and Development Support Unit, Dumfries and Galloway Royal infirmary, Bankend Road, Dumfries DG1 4AP.

Dr A Gordon Baird affirms that this manuscript is an honest, accurate, and transparent account of the study being reported; that no important aspects of the study have been omitted; any discrepancies from the study as planned have been explained.

### **Contributorship Statement**

Both authors discussed the hypothesis that there was a disproportionate use of poor evidence in longer guidelines; both checked the raw data, and agreed on a statistical approach to discover whether the trend was significant or not. Both have been involved in writing and researching the evidence.

### **Funding.**

This research received no specific grant from any funding agency in the public, commercial or not-for-profit sectors.

### **Data Sharing.**

Technical appendix, statistical code, and dataset available from the corresponding author, who will provide a permanent, citable and open access home for the dataset.

### **Competing interests**

No competing interests

### **MeSH Headings**

- Practice Guideline N04.761.700.350.650
- General Practice H02.403.340
- Evidence-Based Medicine H02.249.750

### **How this fits in.**

Guidelines should encourage an evidence-based approach to clinical practice. Longer guidelines used significantly higher levels of poor evidence. WHO has proposed a different system of grading evidence. The effect of group behavior altering guideline development has been hypothesised. New research often challenges established clinical practice. Improving the quality of evidence, acknowledging uncertainty and shortening guideline length would make guidelines more clinically relevant and effective.



## REFERENCES

1. Harbour R, Lowe G, Twaddle S. Scottish Intercollegiate Guidelines Network; the first 15 years (1993-2008). *J R Coll Physicians Edinb* 2011 Jun;41(2) 163-168
2. de Joncheere K, Hill S, Klazinga N, et al. The Clinical Guideline Programme of the National Institute for Health and Clinical Excellence (NICE) A review by the World Health Organization May 2006
3. Lenzer J. Why we can't trust clinical guidelines: *BMJ* 2013;346:f3830
4. Aylett V. Do geriatricians need guidelines? *BMJ* 2010 Sep;341:c5340
5. Prasad V, Cifu A, Ioannidis JP. Reversals of Established Medical Practices: Evidence to Abandon Ship. *JAMA*. 2012 Jan4;307(1):37-38,
6. Prasad V, Gall V, Cifu A. The frequency of medical reversal. *Arch Int Med*. 2011 Oct 10;. 171(18): 1675-1676
7. SIGN 50: A guideline developer's handbook <http://www.sign.ac.uk/pdf/sign50.pdf>
8. Tricoci P, Allen JM, Kramer JM, et al. Scientific evidence underlying the ACC/AHA clinical practice guidelines. *JAMA* 2009 Feb25; 301 (8): 831-841
9. Raine, R, Sanderson C, Black N. Developing clinical guidelines: a challenge to current methods. *BMJ*. 331(7517):631-633, September 17, 2005
10. Echt DS, Liebson PR, Mitchell LB, et al. Mortality and morbidity in patients receiving encainide, flecainide, or placebo - The Cardiac Arrhythmia Suppression Trial. *New Eng J Med*. 1991 Mar21; 324 (12): 781-788
11. Binanay C, Califf RM, Hasselblad V, et al. Evaluation study of congestive heart failure and pulmonary artery catheterization effectiveness: the ESCAPE trial. *JAMA*. 2005 Oct 5;294(13):1625-33.
12. Tatsioni A, Bonitsis NG, Ioannidis JA. Persistence of Contradicted Claims in the Literature. *JAMA*. 2007 Dec5 ;298(21):2517-2526.
13. Anderson JE, McKenzie C, Singh N, et al. Compliance with the 62 day target does not improve long-term survival. Association of Coloproctology of Great Britain and Ireland Annual Meeting 2012 Dublin Ireland.
14. Kerr J, Smith R, Gray S, et al. An audit of clinical practice in the management of head injured patients following the introduction of the Scottish Intercollegiate Guidelines Network (SIGN) recommendations. *Emerg Med J*. 2005 Dec; 22(12):850-854

- 1  
2  
3 15. Caplan LR. How well does "evidence-based" medicine help neurologists care for  
4 individual patients? *Revin Neurol Dis.*2007;4(2):75-84  
5  
6  
7 16.Hutchison G. Guidelines can harm patients too. *BMJ (Clinical research ed.)*. 2012  
8 Apr18;344: e2685.  
9  
10 17. Woolf SH, Grol R, Hutchinson A, et al. Clinical guidelines. Potential benefits,  
11 limitations, and harms of clinical guidelines. *BMJ* 1999 Feb20;318(7182):527-530  
12  
13 18. Miller L., Kidd A. Are sign guidelines key in the decision to CT? Post-head injury  
14 CT scanning within a paediatric population. *Academic Emergency Medicine*.  
15 Conference: 14th International Conference on Emergency Medicine, ICEM 2012  
16 Dublin Ireland. Conference Publication: 19 (6) (pp 776), 2012. Date of Publication:  
17 June 2012.  
18  
19  
20 19. Thomson R., Eccles M., Wood R., et al. A cautionary note on data sources for  
21 evidence-based clinical decisions: Warfarin and stroke prevention. *MedDecis*  
22 *Making*. 2007;27 (4): 438-447  
23  
24 20. Yudkin JS, Lipska KJ, Montori VM. The idolatry of the surrogate. *BMJ*. 2011  
25 Dec28;343:d7995  
26  
27  
28 21. Cohen D. Rosiglitazone: what went wrong? *BMJ*.2010 Sep; 341:c4848  
29  
30  
31 22. Gerstein HC, Miller ME, Byington RP, et al. Effects of intensive glucose lowering  
32 in type 2 diabetes. Action to Control Cardiovascular Risk in Diabetes Study Group.  
33 *New Engl J Med*. 2008 Jun12;358(24):2545-59  
34  
35 23. Rashidian A, Eccles MP, Russell I. Falling on stony ground? A qualitative study of  
36 implementation of clinical guidelines' prescribing recommendations in primary care.  
37 *Health Policy*.2008 Feb; 85 (2) 148-161  
38  
39  
40 24.Guy S, Wardlaw JM. Who writes guidelines, and who should? *ClinRadiol*. 2002 Oct  
41 ;57 (10): 891-897.  
42  
43 25. Greenhalgh, Trisha. *How To Read a Paper: The Basics of Evidence-Based*  
44 *Medicine*. Wiley-Blackwell, fourth edition, 2010, p. 1  
45  
46 26. Zuiderent-Jerak T, Forland F, Macbeth F. Guidelines should reflect all knowledge,  
47 not just trials *BMJ* 2012;345:e6702  
48  
49  
50 27.GRADE working group. Grading quality of evidence and strength of  
51 recommendations. *BMJ* 2004;328:1490  
52  
53  
54 28. Harbour R, Miller J. A new system for grading recommendations in evidence  
55 based guidelines. *BMJ*. 2001 Aug 11;323(7308):334-6  
56  
57  
58  
59  
60

1  
2  
3  
4  
5  
6  
7  
8  
9  
10  
11  
12  
13  
14  
15  
16  
17  
18  
19  
20  
21  
22  
23  
24  
25  
26  
27  
28  
29  
30  
31  
32  
33  
34  
35  
36  
37  
38  
39  
40  
41  
42  
43  
44  
45  
46  
47  
48  
49  
50  
51  
52  
53  
54  
55  
56  
57  
58  
59  
60

For peer review only

1  
2  
3  
4  
5  
6  
7  
8 **~~SIGN-Scottish Intercollegiate Guideline Network Guidelines—~~**  
9 **analysis of evidence levels for their recommendations.**  
10

11 *Alternatively*

12  
13  
14 **Guideline ~~s— is bigger recommendations are more~~ better? A**  
15 **review of Scottish Intercollegiate Guideline Network SIGN**  
16 **national guidelines.**  
17  
18  
19  
20

21 Dr A Gordon Baird, MB ChB MRCOG FRCGP R&D General  
22 Practice Adviser, Research and Development Support Unit,  
23 Dumfries and Galloway Royal infirmary, Bankend Road,  
24 Dumfries, Scotland, UK DG1 4AP.  
25  
26  
27

28 Address for correspondence; Dr A Gordon Baird, The White  
29 House, Sandhead, Wigtownshire UK. DG9 9JA. Email  
30 [gordon.baird@me.com](mailto:gordon.baird@me.com). Phone/fax 01776830281  
31  
32  
33

34 Dr James R Lawrence, BSc MD FRCP(Glas & Edin) R&D Clinical  
35 Lead, Research and Development Support Unit, Dumfries and  
36 Galloway Royal infirmary, Bankend Road, Dumfries, Scotland,  
37 UK DG1 4AP.  
38  
39  
40

41 MeSH headings

42 General practice / Family practice

43 HEALTH SERVICES ADMINISTRATION & MANAGEMENT

44 Protocols & guidelines

45 Quality in health care

46 Clinical governance  
47  
48  
49  
50  
51  
52  
53  
54  
55  
56  
57  
58  
59  
60

## **ABSTRACT**

### **Background**

National guidelines have become an integral part of UK general practice and aim to effectively deliver quality and consistency in clinical practice. As with any intervention, there are negative as well as positive consequences. Guideline effectiveness depends on the quality of evidence used.

### **Aim**

To quantify and analyse the quality of evidence that is presented in national guidelines.

### **Design and setting**

Levels of evidence used in all the current valid recommendations in the Scottish Intercollegiate Guideline Network (SIGN) guidelines were reviewed and statistically analysed.

### **Method**

The data was collected from published guidelines available online to the public. SIGN methodology entails a professional group selected by a national organisation to develop each of these guidelines. Statistical analysis of the relationship between the number of guideline recommendations and the quality of evidence used in its recommendations was performed.

### **Result**

A significant correlation between the number of recommendations in a guideline and the use of level D evidence was discovered.

### **Conclusion**

Practice guidelines should be brief and based on scientific evidence. Paradoxically the longest guidelines have the highest proportion of recommendations based on the lowest level of evidence. Guideline developers should be more aware of the need for brevity and a stricter application of evidence-based principles could achieve this. The findings support calls for a review of how evidence is used and presented in guidelines.

## **Article Summary**

### **Article focus**

Examines the hypothesis that larger guidelines rely disproportionately on poor evidence.

### **Key Messages**

- One third of current national guidelines are supported only by case reports, case studies and expert opinion.
- Guidelines with large numbers of recommendations used a higher proportion of weak evidence.
- Guideline development groups appear to vary in their approach to offering recommendations.
- Guideline recommendations should be based on good evidence.
- Paucity of evidence should highlight topics for research.

### **Strengths and limitations of the study**

#### **Strengths.**

- This is the first objective evidence of inconsistencies in approach by a national guideline developers
- This supports commentator suggestion that even without good evidence a group will prefer consensus.
- Adds to the current debate about how guidelines might be developed in the future

#### **Limitations.**

- The study is limited to only one set of national guidelines (SIGN).
- Reasons for the differences in quality of evidence preferred by the guideline development groups is unclear

## **Guidelines – is bigger better? A review of SIGN guidelines.**

### INTRODUCTION

The Scottish Intercollegiate Guidelines Network (SIGN) was founded in 1993. It is a national body, professionally led and publicly funded. SIGN's founding principles proposed direct links between evidence and recommendations, offering a brief and succinct quick-reference guide for clinicians [1]. Guidelines anticipated presenting brief, evidence based clinical advice. They have developed into long and authoritative texts used by managers and politicians to inform policy. A formal arrangement between SIGN and the National Institute of Clinical Excellence (NICE) has existed from 2003. ~~SIGN has~~Both have responsibility to consider cost-effectiveness and ~~directly~~ inputs to the Quality Outcomes Framework (QOF). ~~A formal arrangement between SIGN and the National Institute of Clinical Excellence (NICE) has existed from 2003.~~

The World Health Organisation (WHO) recognises that current grades of recommendation (Table 1) may be ambiguous [2] and encourages guideline developers to use a system which includes a category "Use only in the context of research" where doubt exists.

Guideline developers have conflict of interest policies reported as challenging to apply. Where doubt exists, groups of specialists may feel consensus more defensible than acknowledging uncertainty. [3]

Even with the best evidence, concerns are expressed about the relevance of guidelines in treating patients with multiple morbidities [4], and the emergence of the phenomenon of reversal [5,6], where established practice, sometimes evidence based, is shown to be sub-optimal or harmful. This study looks at the quality of evidence used for SIGN guidelines, and describes a significant trend for some groups to emphasise poorly evidence-backed recommendations.

## METHODS

SIGN guidelines were accessed online in September 2013. SIGN guidelines were chosen because they are internationally respected, the authors were familiar with their format and they contribute to national government policy. Guidelines that were "Current" and "Current 3-7 years". Some recommendations may be out of date." were included. Those that had been "Withdrawn", "Recommendations being updated", "Need for update being considered" and those with no recommendations were excluded.

SIGN guideline 50 clearly describes an established process for developing guidelines.<sup>[7]</sup> It explains how the process is planned, how it is implemented and by whom. This process is independent of this study, but is stated to be an objective process. SIGN guidelines have four grades of recommendation outlined in table 1. Table 2 describes the level of evidence SIGN uses to support the recommendation grading. SIGN guideline development groups vary in size depending on the scope of the topic under consideration, but generally comprise between 15 and 25 members. SIGN states they are aware of the many psychosocial factors, including the problems of overcoming professional hierarchies that can affect small group processes.

3 investigators (JRL, AGB, ABB) independently enumerated the level of evidence used by each examined guideline ~~was independently enumerated by 3 investigators, and discrepancies resolved.~~ They discounted any duplication implicit in text-embedded key recommendations and also implementation recommendations. There were no discrepancies. A statistical analysis of the correlation between the proportion of level D evidence and the total number of recommendations was performed for the 42 guidelines.

## RESULTS

The 42 guidelines consisted of 2559 pages (including references), ranging from 26 to 161 (median 59.5) pages. The longest guideline, number 116 was 61 pages longer than the next largest. The number of recommendations per page ranged from 0.2 to



1  
2  
3  
4  
5  
6 1.8 (median 0.7). The number of recommendations per guideline is presented in  
7 table 3.  
8  
9

10  
11 Of the 1999 recommendations, 480 (24.0%) were level A, 491(24.6 %) were level B,  
12 318 (15.9%) level C, and 710 (35.5%) level D. Thus 51.4% were poorly evidenced  
13 (C&D) and over a third (D) developed almost entirely on “expert opinion”. The  
14 number of level A recommendations per guideline ranged from 0-57 (median 9),  
15 level B from 2-62 (median 8.5) level C ranged from 0-26 (median 6) and D from 0-60  
16 (median 14.5). 4 guidelines had no level A evidence.  
17  
18  
19

20  
21 The proportion of level D evidence increases with the number of recommendations  
22 made. This correlation is significant with Kendall’s Tau=0.22 [approximate 95%  
23 confidence interval 0.008-0.45] p value =0.04, and Spearman rho=0.22 [approximate  
24 95% CI 0.02-0.57] p value= .04.  
25  
26  
27

## 28 29 30 DISCUSSION

31 This study reveals that expert groups who produce long guidelines rely on poor  
32 evidence more heavily than others. While this study only looks at SIGN, this study  
33 highlights a problem that has escaped national guideline developers, a wide range of  
34 professionals and the public to whom these guidelines are applied. National  
35 guidelines are useful and important and there is a debate about how evidence is  
36 best presented. Guidelines define standards of care, help busy clinicians and allow  
37 managers and politicians to develop governance. An American study (using 3 not 4  
38 levels of evidence) similarly found that 48% were “based on expert opinion, case  
39 studies, or standards of care.” [8]; we show comparable results for current SIGN  
40 guidelines. Where patients are involved in clinical decisions, honestly declaring  
41 uncertainty has merit. In the absence of good scientific evidence, recommending a  
42 course of action without understanding the circumstances of the individual to whom  
43 it is applied seems both risky and, assuming a right to patient choice, unwarranted.  
44 Other guidelines that use high levels of poor evidence should evaluate the  
45 proportion of poorly evidenced recommendations and seek explanations for such  
46 trends.  
47  
48  
49  
50  
51  
52  
53  
54  
55  
56  
57  
58  
59  
60

1  
2  
3  
4  
5  
6  
7  
8 This study did not examine why longer guidelines use poorer evidence. ~~Cloistered~~  
9 ~~G~~groups of experts, indulging in “group think” may view their own opinion as more  
10 authoritative than science can support<sup>[9]</sup>. It has been postulated that there is  
11 security in “just doing what everyone else is doing – even if what everyone else is  
12 doing isn’t very good.”<sup>[3]</sup> Reliance on expert opinion has a poor track record.  
13 Blinded by certainty, expert groups defining established practice have, in the past,  
14 perpetuated radical mastectomy instead of conservative surgery, Class 1C  
15 antiarrhythmics<sup>[10]</sup>, pulmonary artery catheters in heart failure<sup>[11]</sup>, electronic foetal  
16 monitoring in low risk pregnancies: even then practice can take a decade to  
17 reverse<sup>[12]</sup>.

Comment [GB1]: New reference

24  
25 Even good evidence is subject to the phenomenon of reversal where new evidence  
26 contradicts current practice. Reversal can affect around 13-16% of publications <sup>[5,6]</sup>.  
27 This may partly explain why the implementation of even the most soundly evidence  
28 based national guidelines fails to improve outcome <sup>[13-15]</sup>. There is potential  
29 harm<sup>[16,17]</sup> from guidelines in real clinical settings, for example increasing radiation  
30 dose without benefit<sup>[18]</sup> or increased risks of anticoagulation<sup>[19]</sup>.

31  
32  
33  
34  
35  
36 SIGN 116 (diabetes), is a notable exception. It is more than 50% larger than the next  
37 largest, 2.5 times longer than the average and yet uses the 4<sup>th</sup> lowest level D  
38 recommendations. There are a number of hypotheses why this group reports  
39 differently. SIGN guidelines inform Quality Outcomes Framework (QOF) policy.  
40 Diabetes is the largest clinical UK QOF indicator and is associated with substantial  
41 payment incentives. The need for objective evaluation of performance drives a use  
42 of surrogate outcomes without appropriate clinical endpoints. <sup>[20]</sup> Diabetes  
43 guidelines have suffered several noteworthy reversals. Examples include the  
44 recommendation of glycosylated haemoglobin reduction resulting in increased use  
45 of rosiglitazone (still mentioned in the current document) both associated with harm  
46 including mortality. <sup>[21,22]</sup> Aspirin recommendations have also been changed from  
47 previous guidelines. Is it possible that the repeated use of surrogate outcomes arises  
48 from group dynamics driven by a powerful external agenda?  
49  
50  
51  
52  
53  
54  
55  
56  
57  
58  
59  
60

1  
2  
3  
4  
5  
6  
7  
8 | Many doctors whose expertise cross several guidelines<sup>[23,24]</sup> express concerns  
9 about guideline development groups. The inappropriate exclusion of disease groups  
10 from general population data is common. Smoking cessation advice for testicular  
11 cancer survivors is level C, although studies in the general population (without  
12 excepting specific disease groups) advises everyone to stop smoking. Overall  
13 smoking cessation was level D and C once each and B on three occasions. Using  
14 evidence in this way may imply group dysfunction. Differently constituted groups, or  
15 greater oversight might avoid problems.  
16  
17  
18  
19  
20

21  
22 In 1993, SIGN guidelines stated intention was to be evidence based, brief and  
23 succinct. Brevity increases value as a quick reference guide. Removing or reducing  
24 poorly evidenced recommendations would reduce size by more than a third overall  
25 and in some up to two thirds. The two volumes Oxford Textbook of Primary Medical  
26 Care (2005) is a relatively brief 1420 pages, more than a thousand less than the 2559  
27 pages of guidelines. Evidence based medicine is described as “the use of  
28 mathematical estimates of the risk of benefit and harm, derived from high-quality  
29 research on population samples, to inform clinical decision-making in the diagnosis,  
30 investigation or management of individual patients”<sup>[25]</sup>. Guidelines relevance to  
31 daily practice, the reliability of evidence and whether the application of evidence will  
32 improve outcomes are important questions.  
33  
34  
35  
36  
37  
38  
39

40  
41 These results may reflect how professional groups deal with uncertainty. If so, this is  
42 not good for individual patients faced with the same uncertainties (whether aware  
43 of it or not), nor is it good for scientists who actively seek unanswered questions by  
44 challenging established practice, an area in which medicine has a poor record from  
45 Semmelweis to the present day.  
46  
47  
48  
49

50  
51 The finding of a significant increase of level D recommendations in larger guidelines  
52 has not happened by chance. A wider debate about how guideline groups can create  
53 greater clarity about the reliability of evidence used is needed.<sup>[26<sup>†</sup>]</sup>—Reducing the  
54 use of poorly evidenced recommendations has potential to create a shorter, more  
55  
56  
57  
58  
59  
60

reliable and usable clinical support. The GRADE working group was formed in 2000.<sup>[27]<sup>2</sup></sup> SIGN ~~proposed a move~~ moved to a new grading system in 2001<sup>[28]<sup>3</sup></sup> and ~~from 2013 a new system based on GRADE principles.~~ Whether these changes ~~in process at present being considered~~ will resolve the challenges that underpin the inconsistencies we have outlined remains to be seen.

The authors would like to acknowledge the help of Heather Barrington, Dumfries & Galloway Royal Infirmary, Research & Development Support Unit Dumfries, Dumfries & Galloway, United Kingdom who gave statistical advice and support, and Anne B Baird, The white House, Sandhead, Wigtownshire DG9 9JA who checked the data for inconsistencies.

Table 1

## GRADES OF RECOMMENDATION

|          |                                                                                                                                                                                                                                                                                              |
|----------|----------------------------------------------------------------------------------------------------------------------------------------------------------------------------------------------------------------------------------------------------------------------------------------------|
| <b>A</b> | At least one meta-analysis, systematic review, or RCT rated as 1++, and directly applicable to the target population; or<br>A body of evidence consisting principally of studies rated as 1+, directly applicable to the target population, and demonstrating overall consistency of results |
| <b>B</b> | A body of evidence including studies rated as 2++, directly applicable to the target population and demonstrating overall consistency of results; or<br>Extrapolated evidence from studies rated as 1++ or 1+                                                                                |
| <b>C</b> | A body of evidence including studies rated as 2+, directly applicable to the target population and demonstrating overall consistency of results; or<br>Extrapolated evidence from studies rated as 2++                                                                                       |
| <b>D</b> | Evidence level 3 or 4; or<br>Extrapolated evidence from studies rated as 2+                                                                                                                                                                                                                  |

Table 2

|            |                                                                                              |
|------------|----------------------------------------------------------------------------------------------|
| <b>1++</b> | High quality meta-analyses, systematic reviews of RCTs, or RCTs with a very low risk of bias |
| <b>1+</b>  | Well conducted meta-analyses, systematic reviews, or RCTs with a low risk of bias            |
| <b>1 -</b> | -Meta-analyses, systematic reviews, or RCTs with a high risk of bias                         |
| <b>2++</b> | High quality systematic reviews of case control or cohort studies                            |

1  
2  
3  
4  
5  
6  
7  
8  
9  
10  
11  
12  
13  
14  
15  
16  
17  
18  
19  
20  
21  
22  
23  
24  
25  
26  
27  
28  
29  
30  
31  
32  
33  
34  
35  
36  
37  
38  
39  
40  
41  
42  
43  
44  
45  
46  
47  
48  
49  
50  
51  
52  
53  
54  
55  
56  
57  
58  
59  
60

|            |                                                                                                                                                |
|------------|------------------------------------------------------------------------------------------------------------------------------------------------|
| <b>2+</b>  | High quality case control or cohort studies with a very low risk of confounding or bias and a high probability that the relationship is causal |
| <b>2 -</b> | Case control or cohort studies with a high risk of confounding or bias and a significant risk that the relationship is not causal              |
| <b>3</b>   | Non-analytic studies, eg case reports, case series                                                                                             |
| <b>4</b>   | Expert opinion                                                                                                                                 |

Table 3  
Main Recommendations

| Number | Name                                                                                                                   | Pages        | A           | B          | C          | D          | Total      | %age D      |
|--------|------------------------------------------------------------------------------------------------------------------------|--------------|-------------|------------|------------|------------|------------|-------------|
| 133    | Management of hepatitis C                                                                                              | 57           | 20          | 24         | 7          | 52         | <b>103</b> | 50.5%       |
| 132    | Long-term follow-up of survivors of childhood cancer                                                                   | 62           | 0           | 7          | 9          | 14         | <b>30</b>  | 46.7%       |
| 131    | Management of schizophrenia                                                                                            | 64           | 10          | 19         | 3          | 15         | <b>47</b>  | 31.9%       |
| 130    | Brain injury rehabilitation in adults                                                                                  | 68           | 0           | 14         | 7          | 8          | <b>29</b>  | 27.6%       |
| 129    | Antithrombotics: indication and management                                                                             | 68           | 25          | 11         | 6          | 19         | <b>61</b>  | 31.1%       |
| 127    | Management of perinatal mood disorders                                                                                 | 47           | 0           | 5          | 6          | 15         | <b>26</b>  | 57.7%       |
| 126    | Diagnosis and management of colorectal cancer                                                                          | 56           | 11          | 19         | 15         | 29         | <b>74</b>  | 39.2%       |
| 125    | Management of atopic eczema in primary care                                                                            | 34           | 3           | 5          | 3          | 2          | <b>13</b>  | 15.4%       |
| 124    | Management of adult testicular germ cell tumours                                                                       | 63           | 6           | 6          | 9          | 21         | <b>42</b>  | 50.0%       |
| 123    | Management of early rheumatoid arthritis                                                                               | 27           | 3           | 7          | 2          | 0          | <b>12</b>  | 0.0%        |
| 122    | Prevention and management of venous thromboembolism                                                                    | 88           | 26          | 15         | 14         | 55         | <b>110</b> | 50.0%       |
| 121    | Diagnosis and management of psoriasis and psoriatic arthritis in adults                                                | 65           | 11          | 16         | 6          | 26         | <b>59</b>  | 44.1%       |
| 120    | Management of chronic venous leg ulcers                                                                                | 46           | 5           | 3          | 4          | 7          | <b>19</b>  | 36.8%       |
| 119    | Management of patients with stroke: identification and management of dysphagia                                         | 42           | 0           | 6          | 4          | 20         | <b>30</b>  | 66.7%       |
| 118    | Management of patients with stroke: rehabilitation, prevention and management of complications, and discharge planning | 101          | 21          | 29         | 7          | 21         | <b>78</b>  | 26.9%       |
| 117    | Management of sore throat and indications for tonsillectomy                                                            | 37           | 9           | 3          | 4          | 4          | <b>20</b>  | 20.0%       |
| 116    | Management of diabetes                                                                                                 | 161          | 57          | 62         | 23         | 16         | <b>158</b> | 10.1%       |
| 115    | Management of Obesity                                                                                                  | 87           | 6           | 11         | 7          | 11         | <b>35</b>  | 31.4%       |
| 114    | Nonpharmaceutical management of depression                                                                             | 37           | 5           | 4          | 0          | 0          | <b>9</b>   | 0.0%        |
| 113    | Diagnosis and pharmacological management of Parkinson's disease                                                        | 61           | 12          | 6          | 6          | 4          | <b>28</b>  | 14.3%       |
| 112    | Management of attention deficit and hyperkinetic disorders in children and young people                                | 45           | 6           | 4          | 3          | 4          | <b>17</b>  | 23.5%       |
| 111    | Management of hip fracture in old people                                                                               | 49           | 10          | 9          | 8          | 14         | <b>41</b>  | 34.1%       |
| 110    | Early management of patients with a head injury                                                                        | 76           | 1           | 7          | 6          | 17         | <b>31</b>  | 54.8%       |
| 109    | Management of genital Chlamydia trachomatis infection                                                                  | 40           | 3           | 6          | 9          | 29         | <b>47</b>  | 61.7%       |
| 108    | Management of patients with stroke or TIA: assessment, investigation, immediate management and secondary prevention    | 100          | 42          | 27         | 18         | 14         | <b>101</b> | 13.9%       |
| 107    | Diagnosis and management of headache in adults                                                                         | 81           | 17          | 16         | 9          | 34         | <b>76</b>  | 44.7%       |
| 106    | Control of pain in adults with cancer                                                                                  | 71           | 5           | 7          | 3          | 19         | <b>34</b>  | 55.9%       |
| 105    | Management of acute upper and lower gastrointestinal bleeding                                                          | 57           | 14          | 5          | 2          | 15         | <b>36</b>  | 41.7%       |
| 103    | Diagnosis and management of chronic kidney disease                                                                     | 50           | 9           | 6          | 4          | 3          | <b>22</b>  | 13.6%       |
| 102    | Management of invasive meningococcal disease in children and young people                                              | 46           | 1           | 4          | 6          | 26         | <b>37</b>  | 70.3%       |
| 99     | Management of cervical cancer                                                                                          | 73           | 1           | 13         | 19         | 29         | <b>62</b>  | 46.8%       |
| 97     | Risk estimation and the prevention of cardiovascular disease                                                           | 72           | 16          | 12         | 2          | 4          | <b>34</b>  | 11.8%       |
| 96     | Management of stable angina                                                                                            | 59           | 13          | 10         | 3          | 11         | <b>37</b>  | 29.7%       |
| 95     | Management of chronic heart failure                                                                                    | 55           | 9           | 12         | 1          | 1          | <b>23</b>  | 4.3%        |
| 94     | Cardiac arrhythmias and coronary heart disease                                                                         | 42           | 22          | 11         | 13         | 23         | <b>69</b>  | 33.3%       |
| 93     | Acute coronary syndromes                                                                                               | 60           | 11          | 14         | 9          | 8          | <b>42</b>  | 19.0%       |
| 91     | Bronchiolitis in children                                                                                              | 42           | 4           | 3          | 6          | 14         | <b>27</b>  | 51.9%       |
| 90     | Diagnosis and management of head and neck cancer                                                                       | 92           | 42          | 8          | 26         | 60         | <b>136</b> | 44.1%       |
| 89     | Diagnosis and management of peripheral arterial disease                                                                | 37           | 11          | 2          | 0          | 4          | <b>17</b>  | 23.5%       |
| 88     | Management of suspected bacterial urinary tract infection in adults                                                    | 45           | 8           | 10         | 2          | 10         | <b>30</b>  | 33.3%       |
| 87     | Management of oesophageal and gastric cancer                                                                           | 70           | 3           | 26         | 23         | 28         | <b>80</b>  | 35.0%       |
| 61     | Investigation of postmenopausal bleeding                                                                               | 26           | 2           | 7          | 4          | 4          | <b>17</b>  | 23.5%       |
|        |                                                                                                                        | <b>TOTAL</b> | <b>2559</b> | <b>480</b> | <b>491</b> | <b>318</b> | <b>710</b> | <b>1999</b> |

### Acknowledgements.

1  
2  
3  
4  
5  
6  
7 Heather Barrington, Statistical Adviser; Bridget Bird, Administrative Assistant;  
8 Research and Development Support Unit, Dumfries and Galloway Royal infirmary,  
9 Bankend Road, Dumfries DG1 4AP.

10 Dr A Gordon Baird affirms that this manuscript is an honest, accurate, and  
11 transparent account of the study being reported; that no important aspects of the  
12 study have been omitted; any discrepancies from the study as planned have been  
13 explained.  
14

### 15 16 17 **Contributorship Statement**

18 **Both authors discussed the hypothesis that there was a disproportionate use of**  
19 **poor evidence in longer guidelines; both checked the raw data, and agreed on a**  
20 **statistical approach to discover whether the trend was significant or not. Both**  
21 **have been involved in writing and researching the evidence.**  
22

### 23 24 **Funding.**

25 This research received no specific grant from any funding agency in the public,  
26 commercial or not-for-profit sectors.  
27

### 28 29 **Data Sharing.**

30 Technical appendix, statistical code, and dataset available from the corresponding  
31 author, who will provide a permanent, citable and open access home for the dataset.  
32

### 33 34 **Competing interests**

35 No competing interests  
36

### 37 **MeSH Headings**

- 38 • Practice Guideline N04.761.700.350.650
- 39 • General Practice H02.403.340
- 40 • Evidence-Based Medicine H02.249.750

### 41 42 **How this fits in.**

43 Guidelines should encourage an evidence-based approach to clinical practice. Longer  
44 guidelines used significantly higher levels of poor evidence. WHO has proposed a  
45 different system of grading evidence. The effect of group behavior altering guideline  
46 development has been hypothesised. New research often challenges established  
47 clinical practice. Improving the quality of evidence, acknowledging uncertainty and  
48 shortening guideline length would make guidelines more clinically relevant and  
49 effective.  
50

### 51 **REFERENCES**

52  
53 **[1. Harbour R, Lowe G, Twaddle S. Scottish Intercollegiate Guidelines Network; the](#)**  
54 **[first 15 years \(1993-2008\). J R Coll Physicians Edinb 2011 Jun;41\(2\) 163-168](#)**  
55  
56  
57  
58  
59  
60

- 1  
2  
3  
4  
5  
6 [2. de Joncheere K, Hill S, Klazinga N, Mäkelä M, Oxman AD. The Clinical Guideline Programme of the National Institute for Health and Clinical Excellence \(NICE\) A review by the World Health Organization May 2006](#)
- 7  
8  
9  
10 [3. Lenzer J. Why we can't trust clinical guidelines: BMJ 2013;346:f3830](#)
- 11  
12 [4. Aylett V. Do geriatricians need guidelines? BMJ 2010 Sep;341:c5340](#)
- 13  
14  
15 [5. Prasad V, Cifu, A, Ioannidis JP. Reversals of Established Medical Practices: Evidence to Abandon Ship. JAMA. 2012 Jan4;307\(1\):37-38,](#)
- 16  
17  
18 [6. Prasad V, Gall V, Cifu A. The frequency of medical reversal. Arch Int Med. 2011 Oct 10; 171\(18\): 1675-1676](#)
- 19  
20  
21 [7. SIGN 50: A guideline developer's handbook <http://www.sign.ac.uk/pdf/sign50.pdf>](#)
- 22  
23 [8. Tricoci P, Allen JM, Kramer JM, Califf RM, Smith Jr. SC. Scientific evidence underlying the ACC/AHA clinical practice guidelines. JAMA 2009 Feb25; 301 \(8\): 831-841](#)
- 24  
25  
26  
27 [9. Raine, R, Sanderson C, Black N. Developing clinical guidelines: a challenge to current methods. BMJ. 331\(7517\):631-633, September 17, 2005](#)
- 28  
29  
30  
31 [10. Echt DS, Liebson PR, Mitchell LB, Peters RW, Obias-Manno D, Barker AH, Arensberg D, Baker A, Friedman L, Greene HL, Huther ML, Richardson DW. Mortality and morbidity in patients receiving encainide, flecainide, or placebo - The Cardiac Arrhythmia Suppression Trial. New Eng J Med. 1991 Mar21; 324 \(12\): 781-788](#)
- 32  
33  
34  
35 [11. Binanay C, Califf RM, Hasselblad V, O'Connor CM, Shah MR, Sopko G, Stevenson LW, Francis GS, Leier CV, Miller LW Evaluation study of congestive heart failure and pulmonary artery catheterization effectiveness: the ESCAPE trial. JAMA. 2005 Oct 5;294\(13\):1625-33.](#)
- 36  
37  
38  
39  
40 [12. Tatsioni A, Bonitsis NG, Ioannidis JA. Persistence of Contradicted Claims in the Literature. JAMA. 2007 Dec5 ;298\(21\):2517-2526.](#)
- 41  
42  
43  
44 [13. Anderson JE, McKenzie C, Singh N, Gajree N, Giles L, Sharma P, McDonald A. Compliance with the 62 day target does not improve long-term survival. Association of Coloproctology of Great Britain and Ireland Annual Meeting 2012 Dublin Ireland.](#)
- 45  
46  
47  
48 [14. Kerr J, Smith R, Gray S, Beard D, Robertson CE. An audit of clinical practice in the management of head injured patients following the introduction of the Scottish Intercollegiate Guidelines Network \(SIGN\) recommendations. Emerg Med J. 2005 Dec; 22\(12\):850-854](#)
- 49  
50  
51  
52  
53 [15. Caplan LR. How well does "evidence-based" medicine help neurologists care for individual patients? Rev Neurol Dis. 2007;4\(2\):75-84](#)
- 54  
55  
56  
57  
58  
59  
60



16. [Hutchison G. Guidelines can harm patients too. BMJ \(Clinical research ed.\). 2012 Apr18;344: e2685.](#)
17. [Woolf SH, Grol R, Hutchinson A, Eccles M, Grimshaw J. Clinical guidelines. Potential benefits, limitations, and harms of clinical guidelines. BMJ 1999 Feb20;318\(7182\):527-530](#)
18. [Miller L., Kidd A. Are sign guidelines key in the decision to CT? Post-head injury CT scanning within a paediatric population. Academic Emergency Medicine. Conference: 14th International Conference on Emergency Medicine, ICEM 2012 Dublin Ireland. Conference Publication: 19 \(6\) \(pp 776\), 2012. Date of Publication: June 2012.](#)
19. [Thomson R., Eccles M., Wood R., Chinn D.J. A cautionary note on data sources for evidence-based clinical decisions: Warfarin and stroke prevention. MedDecis Making. 2007;27 \(4\): 438-447](#)
20. [Yudkin JS, Lipska KJ, Montori VM. The idolatry of the surrogate. BMJ. 2011 Dec28;343:d7995](#)
21. [Cohen D. Rosiglitazone: what went wrong? BMJ.2010 Sep; 341:c4848](#)
22. [Gerstein HC, Miller ME, Byington RP, Goff DC Jr., Bigger JT, Buse JB, Cushman WC, Genuth S, Ismail-Beigi F, Grimm RH Jr. Probstfield JL, Simons-Morton DG, Friedewald WT. Effects of intensive glucose lowering in type 2 diabetes. Action to Control Cardiovascular Risk in Diabetes Study Group. New Engl J Med. 2008 Jun12;358\(24\):2545-59](#)
23. [Rashidian A, Eccles MP, Russell I. Falling on stony ground? A qualitative study of implementation of clinical guidelines' prescribing recommendations in primary care. Health Policy.2008 Feb; 85 \(2\) 148-161](#)
24. [Guy S, Wardlaw JM. Who writes guidelines, and who should? ClinRadiol. 2002 Oct ;57 \(10\): 891-897.](#)
25. [Greenhalgh, Trisha. How To Read a Paper: The Basics of Evidence-Based Medicine. Wiley-Blackwell, fourth edition, 2010, p. 1](#)
26. [Zuiderent-Jerak T, Forland F, Macbeth F. Guidelines should reflect all knowledge, not just trials BMJ 2012;345:e6702](#)
27. [GRADE working group. Grading quality of evidence and strength of recommendations. BMJ 2004;328:1490](#)
28. [Harbour R, Miller J. A new system for grading recommendations in evidence based guidelines. BMJ. 2001 Aug 11;323\(7308\):334-6](#)

1  
2  
3  
4  
5  
6  
7  
8  
9  
10  
11 [1-Zuiderent Jerak T, Forland F, Macbeth F. Guidelines should reflect all knowledge,  
12 not just trials—BMJ 2012;345:e6702](#)

13 [2-GRADE working group http://www.gradeworkinggroup.org/about-us.htm](http://www.gradeworkinggroup.org/about-us.htm)

14  
15  
16 [3-Harbour R, Miller J. A new system for grading recommendations in evidence-based  
17 guidelines. BMJ. 2001 Aug 11;323\(7308\):334-6.](#)

TABLE 1

## Grades of recommendation

|   |                                                                                                                                                                                                                                                                                            |
|---|--------------------------------------------------------------------------------------------------------------------------------------------------------------------------------------------------------------------------------------------------------------------------------------------|
| A | At least one meta-analysis ,systematic review, or RCT rated as 1++and directly applicable to the target population; or<br>a body of evidence consisting principally of studies rated as 1+,directly applicable to the target population, and demonstrating overall consistency of results. |
| B | A body of evidence including studies rated as 2++, directly applicable to the target population and demonstrating overall consistency of results; or<br>Extrapolated evidence from studies rated as 1++ or 1+.                                                                             |
| C | A body of evidence including studies rated as 2+, directly applicable to the target population and demonstrating overall consistency of results; or<br>Extrapolated evidence from studies rated as 2+.                                                                                     |
| D | Evidence level 3 or 4; or<br>Extrapolated evidence from studies rated as 2=.                                                                                                                                                                                                               |

Table 2

## Levels of evidence

|            |                                                                                                                                                                                                                      |
|------------|----------------------------------------------------------------------------------------------------------------------------------------------------------------------------------------------------------------------|
| <b>1++</b> | High quality meta-analyses, systematic reviews of RCTs, or RCTs with a very low risk of bias                                                                                                                         |
| <b>1+</b>  | Well conducted meta-analyses, systematic reviews, or RCTs with a low risk of bias                                                                                                                                    |
| <b>1 -</b> | Meta-analyses, systematic reviews, or RCTs with a high risk of bias                                                                                                                                                  |
| <b>2++</b> | High quality systematic reviews of case control or cohort studies.<br>High quality case control or cohort studies with a very low risk of confounding or bias and a high probability that the relationship is causal |
| <b>2+</b>  | Well conducted case control or cohort studies with a low risk of confounding or bias and a moderate probability that the relationship is causal                                                                      |
| <b>2 -</b> | Case control or cohort studies with a high risk of confounding or bias and a significant risk that the relationship is not causal                                                                                    |
| <b>3</b>   | Non-analytic studies, eg case reports, case series                                                                                                                                                                   |
| <b>4</b>   | Expert opinion                                                                                                                                                                                                       |

Table 3 – for editing

| Number | Number | Name                                                                                                                   | Pages | Main Recommendations |    |    |    | Total      | %age D |
|--------|--------|------------------------------------------------------------------------------------------------------------------------|-------|----------------------|----|----|----|------------|--------|
|        |        |                                                                                                                        |       | A                    | B  | C  | D  |            |        |
| 133    | 133    | Management of hepatitis C                                                                                              | 57    | 20                   | 24 | 7  | 52 | <b>103</b> | 50.5%  |
| 132    | 132    | Long-term follow-up of survivors of childhood cancer                                                                   | 62    | 0                    | 7  | 9  | 14 | <b>30</b>  | 46.7%  |
| 131    | 131    | Management of schizophrenia                                                                                            | 64    | 10                   | 19 | 3  | 15 | <b>47</b>  | 31.9%  |
| 130    | 130    | Brain injury rehabilitation in adults                                                                                  | 68    | 0                    | 14 | 7  | 8  | <b>29</b>  | 27.6%  |
| 129    | 129    | Antithrombotics: indication and management                                                                             | 68    | 25                   | 11 | 6  | 19 | <b>61</b>  | 31.1%  |
| 127    | 127    | Management of perinatal mood disorders                                                                                 | 47    | 0                    | 5  | 6  | 15 | <b>26</b>  | 57.7%  |
| 126    | 126    | Diagnosis and management of colorectal cancer                                                                          | 56    | 11                   | 19 | 15 | 29 | <b>74</b>  | 39.2%  |
| 125    | 125    | Management of atopic eczema in primary care                                                                            | 34    | 3                    | 5  | 3  | 2  | <b>13</b>  | 15.4%  |
| 124    | 124    | Management of adult testicular germ cell tumours                                                                       | 63    | 6                    | 6  | 9  | 21 | <b>42</b>  | 50.0%  |
| 123    | 123    | Management of early rheumatoid arthritis                                                                               | 27    | 3                    | 7  | 2  | 0  | <b>12</b>  | 0.0%   |
| 122    | 122    | Prevention and management of venous thromboembolism                                                                    | 88    | 26                   | 15 | 14 | 55 | <b>110</b> | 50.0%  |
| 121    | 121    | Diagnosis and management of psoriasis and psoriatic arthritis in adults                                                | 65    | 11                   | 16 | 6  | 26 | <b>59</b>  | 44.1%  |
| 120    | 120    | Management of chronic venous leg ulcers                                                                                | 46    | 5                    | 3  | 4  | 7  | <b>19</b>  | 36.8%  |
| 119    | 119    | Management of patients with stroke: identification and management of dysphagia                                         | 42    | 0                    | 6  | 4  | 20 | <b>30</b>  | 66.7%  |
| 118    | 118    | Management of patients with stroke: rehabilitation, prevention and management of complications, and discharge planning | 101   | 21                   | 29 | 7  | 21 | <b>78</b>  | 26.9%  |
| 117    | 117    | Management of sore throat and indications for tonsillectomy                                                            | 37    | 9                    | 3  | 4  | 4  | <b>20</b>  | 20.0%  |
| 116    | 116    | Management of diabetes                                                                                                 | 161   | 57                   | 62 | 23 | 16 | <b>158</b> | 10.1%  |
| 115    | 115    | Management of Obesity                                                                                                  | 87    | 6                    | 11 | 7  | 11 | <b>35</b>  | 31.4%  |
| 114    | 114    | Nonpharmaceutical management of depression                                                                             | 37    | 5                    | 4  | 0  | 0  | <b>9</b>   | 0.0%   |

Table 3 – for editing

|     |     |                                                                                                                     |     |    |    |    |    |            |       |
|-----|-----|---------------------------------------------------------------------------------------------------------------------|-----|----|----|----|----|------------|-------|
| 113 | 113 | Diagnosis and pharmacological management of Parkinson's disease                                                     | 61  | 12 | 6  | 6  | 4  | <b>28</b>  | 14.3% |
| 112 | 112 | Management of attention deficit and hyperkinetic disorders in children and young people                             | 45  | 6  | 4  | 3  | 4  | <b>17</b>  | 23.5% |
| 111 | 111 | Management of hip fracture in old people                                                                            | 49  | 10 | 9  | 8  | 14 | <b>41</b>  | 34.1% |
| 110 | 110 | Early management of patients with a head injury                                                                     | 76  | 1  | 7  | 6  | 17 | <b>31</b>  | 54.8% |
| 109 | 109 | Management of genital Chlamydia trachomatis infection                                                               | 40  | 3  | 6  | 9  | 29 | <b>47</b>  | 61.7% |
| 108 | 108 | Management of patients with stroke or TIA: assessment, investigation, immediate management and secondary prevention | 100 | 42 | 27 | 18 | 14 | <b>101</b> | 13.9% |
| 107 | 107 | Diagnosis and management of headache in adults                                                                      | 81  | 17 | 16 | 9  | 34 | <b>76</b>  | 44.7% |
| 106 | 106 | Control of pain in adults with cancer                                                                               | 71  | 5  | 7  | 3  | 19 | <b>34</b>  | 55.9% |
| 105 | 105 | Management of acute upper and lower gastrointestinal bleeding                                                       | 57  | 14 | 5  | 2  | 15 | <b>36</b>  | 41.7% |
| 103 | 103 | Diagnosis and management of chronic kidney disease                                                                  | 50  | 9  | 6  | 4  | 3  | <b>22</b>  | 13.6% |
| 102 | 102 | Management of invasive meningococcal disease in children and young people                                           | 46  | 1  | 4  | 6  | 26 | <b>37</b>  | 70.3% |
| 99  | 99  | Management of cervical cancer                                                                                       | 73  | 1  | 13 | 19 | 29 | <b>62</b>  | 46.8% |
| 97  | 97  | Risk estimation and the prevention of cardiovascular disease                                                        | 72  | 16 | 12 | 2  | 4  | <b>34</b>  | 11.8% |
| 96  | 96  | Management of stable angina                                                                                         | 59  | 13 | 10 | 3  | 11 | <b>37</b>  | 29.7% |
| 95  | 95  | Management of chronic heart failure                                                                                 | 55  | 9  | 12 | 1  | 1  | <b>23</b>  | 4.3%  |
| 94  | 94  | Cardiac arrhythmias and coronary heart disease                                                                      | 42  | 22 | 11 | 13 | 23 | <b>69</b>  | 33.3% |
| 93  | 93  | Acute coronary syndromes                                                                                            | 60  | 11 | 14 | 9  | 8  | <b>42</b>  | 19.0% |
| 91  | 91  | Bronchiolitis in children                                                                                           | 42  | 4  | 3  | 6  | 14 | <b>27</b>  | 51.9% |
| 90  | 90  | Diagnosis and management of head and neck cancer                                                                    | 92  | 42 | 8  | 26 | 60 | <b>136</b> | 44.1% |
| 89  | 89  | Diagnosis and management of peripheral arterial disease                                                             | 37  | 11 | 2  | 0  | 4  | <b>17</b>  | 23.5% |
| 88  | 88  | Management of suspected bacterial urinary tract infection in adults                                                 | 45  | 8  | 10 | 2  | 10 | <b>30</b>  | 33.3% |

1  
2  
3  
4  
5  
6  
7  
8  
9  
10  
11  
12  
13  
14  
15  
16  
17  
18  
19  
20  
21  
22  
23  
24  
25  
26  
27  
28  
29  
30  
31  
32  
33  
34  
35  
36  
37  
38  
39  
40  
41  
42  
43  
44  
45  
46  
47  
48  
49

Table 3 – for editing

|              |    |                                              |             |            |            |            |            |             |       |
|--------------|----|----------------------------------------------|-------------|------------|------------|------------|------------|-------------|-------|
| 87           | 87 | Management of oesophageal and gastric cancer | 70          | 3          | 26         | 23         | 28         | <b>80</b>   | 35.0% |
| 61           | 61 | Investigation of postmenopausal bleeding     | 26          | 2          | 7          | 4          | 4          | <b>17</b>   | 23.5% |
| <u>TOTAL</u> |    |                                              | <u>2559</u> | <u>480</u> | <u>491</u> | <u>318</u> | <u>710</u> | <u>1999</u> |       |

For peer review only
